# Adaptive optics two-photon endomicroscopy enables deep brain imaging at synaptic resolution over large volumes

Zhongya Qin<sup>1,3,4,6</sup>, Congping Chen<sup>1,3,4,6</sup>, Sicong He<sup>1,3,4</sup>, Ye Wang<sup>2,3,5</sup>, Kam Fai Tam<sup>2,3,5</sup>, Nancy Y. Ip<sup>2,3,5,\*</sup> and Jianan Y. Qu<sup>1,3,4,\*</sup>

<sup>1</sup>Department of Electronic and Computer Engineering, The Hong Kong University of Science and Technology, Clear Water Bay, Kowloon, Hong Kong, P. R. China

<sup>2</sup>Division of Life Science, The Hong Kong University of Science and Technology, Clear Water Bay, Kowloon, Hong Kong, P. R. China

<sup>3</sup>State Key Laboratory of Molecular Neuroscience, The Hong Kong University of Science and Technology, Clear Water Bay, Kowloon, Hong Kong, P. R. China

<sup>4</sup>Center of Systems Biology and Human Health, The Hong Kong University of Science and Technology, Clear Water Bay, Kowloon, Hong Kong, P. R. China

<sup>5</sup>Molecular Neuroscience Center, The Hong Kong University of Science and Technology, Clear Water Bay, Kowloon, Hong Kong, P.R. China

<sup>6</sup>These authors contributed equally to this work.

\*Corresponding authors: [boip@ust.hk](mailto:boip@ust.hk) (N.Y.I.) and [eequ@ust.hk](mailto:eequ@ust.hk) (J.Y.Q.)

## Abstract

Optical deep brain imaging in vivo at high resolution has remained a great challenge over the decades. Two-photon endomicroscopy provides a minimally invasive approach to image buried brain structures, once it is integrated with a gradient refractive index (GRIN) lens embedded in the brain. However, its imaging resolution and field of view are compromised by the intrinsic aberrations of the GRIN lens. Here, we develop a two-photon endomicroscopy by adding adaptive optics based on the direct wavefront sensing, which enables recovery of diffraction-limited resolution in deep brain imaging. A new precompensation strategy plays a critical role to correct aberrations over large volumes and achieve rapid random-access multiplane imaging. We investigate the neuronal plasticity in the hippocampus, a critical deep brain structure, and reveal the relationship between the somatic and dendritic activity of pyramidal neurons.

## 1. INTRODUCTION

Advances in two-photon microscopy have greatly propelled the studies of neural circuits and brain functions in the past decades, by enabling high-resolution morphological and functional imaging in the living brain. In conjunction with various fluorescent proteins and indicators, two-photon microscopy allows for direct visualization of fine neuronal structures and continuous monitoring of dynamic neural activities at the spatiotemporal scale across orders of magnitude<sup>1,2</sup>. However, imaging has been restricted to the superficial brain regions because of the severe attenuation of

42 both excitation and emission photons at depth caused by tissue scattering. Although a longer  
43 excitation wavelength or red-shifted fluorescence labeling can alleviate the scattering effect, the  
44 imaging depth is still limited to one to two millimeters in the mouse brain and the imaging quality  
45 degrades rapidly with increasing depth<sup>3,4</sup>.

46 To image deeper subcortical structures beyond this limit, an endomicroscopy has been  
47 adopted that relies on implanting a miniature gradient refractive index (GRIN) lens in the brain<sup>5-</sup>  
48 <sup>7</sup>. The rod-like GRIN lens acts as a relay between the microscope objective and the sample below.  
49 This lens has been integrated with the single-photon epifluorescence microscope to image various  
50 neurons lying deep in the brain that are beyond the reach of conventional microscopy<sup>8-10</sup>. However,  
51 the optical resolution for such a miniature single-photon microscope has been limited to the  
52 cellular level, with the image contrast reduced by the out-of-focus fluorescence background. Two-  
53 photon endomicroscopy incorporating a high numerical aperture (NA) GRIN lens has enabled  
54 resolving subcellular structures at high resolution<sup>5,11,12</sup>. However, the imaging field of view (FOV)  
55 is restricted to tens of microns in diameter due to the severe off-axis aberrations of the GRIN lens.  
56 Moreover, for three-dimensional (3D) imaging, because the GRIN lens is embedded in the  
57 biological sample, the focal plane is tuned by changing the distance between the microscope  
58 objective and the GRIN lens, which could lead to severe on-axis aberrations when the excitation  
59 focus deviates axially from the designed optimum<sup>5</sup>. Therefore, the enlarged and distorted point  
60 spread function (PSF) resulting from the intrinsic aberrations significantly limits the 3D imaging  
61 volume of GRIN lens-based endomicroscopy.

62 In recent years, adaptive optics (AO) has greatly advanced two-photon imaging by  
63 introducing a compensatory wavefront distortion to the excitation laser that cancels the system- or  
64 specimen-induced aberrations<sup>13,14</sup>. The wavefront distortion can be determined by either direct<sup>15-</sup>  
65 <sup>19</sup> or indirect<sup>20-22</sup> wavefront sensing. In previous studies, a sensorless AO approach based on pupil  
66 segmentation was used to correct the aberrations of the GRIN lens, improving the resolution over  
67 an enlarged imaging FOV of 205×205  $\mu\text{m}^2$  in a fixed brain slice<sup>23,24</sup>. However, this method is time-  
68 consuming for wavefront estimation and sensitive to sample motion, which limits its application  
69 for *in vivo* imaging. An unmet challenge is to develop robust AO two-photon endomicroscopy  
70 enabling high-resolution imaging over large volumes in the living mouse brain.

71 Here we developed an AO two-photon endomicroscope based on direct wavefront sensing  
72 for high-resolution deep brain imaging *in vivo* (**Supplementary Fig. 1**). Our approach is to use  
73 the two-photon excited fluorescence (TPEF) signal as the intrinsic guide star inside biological  
74 tissues. The wavefront of the descanned guide star is averaged over a small region (typically 30×30  
75  $\mu\text{m}^2$ ) and measured with the Shack-Hartmann wavefront sensor (SHWS) consisting of a microlens  
76 array and an electron-multiplying charge-coupled device (EMCCD)<sup>25</sup>. In order to achieve fast AO  
77 correction over large volume, we first characterized the aberrations of the GRIN lens and  
78 developed a lookup table method to precompensate for its intrinsic aberrations before *in vivo*  
79 imaging. Direct wavefront sensing combined with lookup table method permits accurate, rapid  
80 and robust estimation of the optical aberrations during *in vivo* brain imaging<sup>17</sup>. The wavefront  
81 information is then used by the deformable mirror (DM) that forms a closed loop with the SHWS

82 to create a compensatory distortion to the excitation light and yield a diffraction-limited focus  
83 inside the brain tissues. Using the lookup table and following *in situ* AO correction, we achieved  
84 structural imaging of hippocampal CA1 neurons at synaptic resolution over a large volume. We  
85 studied neuronal plasticity of the hippocampus under various pathological conditions. Furthermore,  
86 by combining our new endomicroscope with a fast electrically tunable lens, we demonstrated  
87 quasi-simultaneous multiplane calcium imaging of neuronal somata and dendrites at high  
88 spatiotemporal resolution.

89  
90

## 91 2. RESULTS

92 To evaluate the efficacy of our approach, we first characterized the intrinsic aberrations of  
93 the GRIN lens using an *in vitro* setup. The GRIN lens was embedded in a rhodamine/agarose  
94 mixture that contains sparsely distributed and immobilized fluorescent beads (200-nm diameter).  
95 The aberration of the GRIN lens was measured by the wavefront distortion of rhodamine  
96 fluorescence, whereas the PSF was determined by imaging the individual fluorescent bead. To  
97 achieve the optimal imaging performance, the GRIN lens was precisely aligned to share the same  
98 optical axis with the objective. Considering the cylindrical symmetry of the GRIN lens, the  
99 cylindrical coordinates ( $r$ ,  $\theta$ ,  $z$ ) were adopted to describe the imaging location in the sample where  
100  $z=0$  corresponds to the designed focal plane of the GRIN lens. The representative on-axis and off-  
101 axis aberrations of the GRIN lens at various depths are shown in **Supplementary Figs. 2 and 3**,  
102 which are primarily dominated by spherical aberration and astigmatism respectively, consistent  
103 with a previous study<sup>24</sup>. As can be seen from the figures, despite the aberrations increasing rapidly  
104 and the PSF becoming severely distorted when the imaging position deviates from the center point,  
105 AO correction can effectively increase the fluorescence signal and recover the diffraction-limited  
106 performance at various depths (**Supplementary Figs. 2 and 3**).

107 We next applied the AO approach to the *in vivo* imaging of the mouse hippocampus, in  
108 which a subset of pyramidal neurons express green fluorescent proteins under thyl promoter  
109 (Thyl-GFP mice). The CA1 pyramidal neurons are vertically oriented with a typical laminar  
110 organization spanning hundreds of microns in depth<sup>26,27</sup>. As can be seen from **Fig. 1a** and  
111 **Supplementary Fig. 3**, with system correction alone, the neuronal somata and dendrites are  
112 severely blurred. After full AO correction and subsequent deconvolution from the local PSF,  
113 however, not only is the fluorescence intensity drastically improved, the dendrites and spines can  
114 also be clearly visualized owing to the substantially enhanced resolutions (**Fig. 1b** and  
115 **Supplementary Fig. 4**). The corrective wavefront primarily contains astigmatism as previously  
116 characterized for the off-axis scenario, implying the aberrations mainly came from the  
117 imperfections of the GRIN lens (**Fig. 1c**). The spectral power shows that the higher spatial  
118 frequency can be significantly recovered by applying full AO correction with subsequent  
119 deconvolution (**Fig. 1d**). Quantitative measurement from individual dendritic spines shows that  
120 both lateral and axial resolutions approached diffraction-limited performance for the GRIN lens  
121 with NA of 0.8 (**Figs. 1e-f**). Furthermore, even for the on-axis scenario where the GRIN lens was

122 designed to yield the best performance, we still achieved significant improvement in resolution  
 123 after full AO correction, with dendritic spines as deep as 300  $\mu\text{m}$  clearly resolved (**Supplementary**  
 124 **Fig. 5**). These results demonstrate that AO based on direct wavefront sensing can effectively  
 125 correct the aberrations of the GRIN lens and recover the diffraction-limited resolution during *in*  
 126 *vivo* imaging.

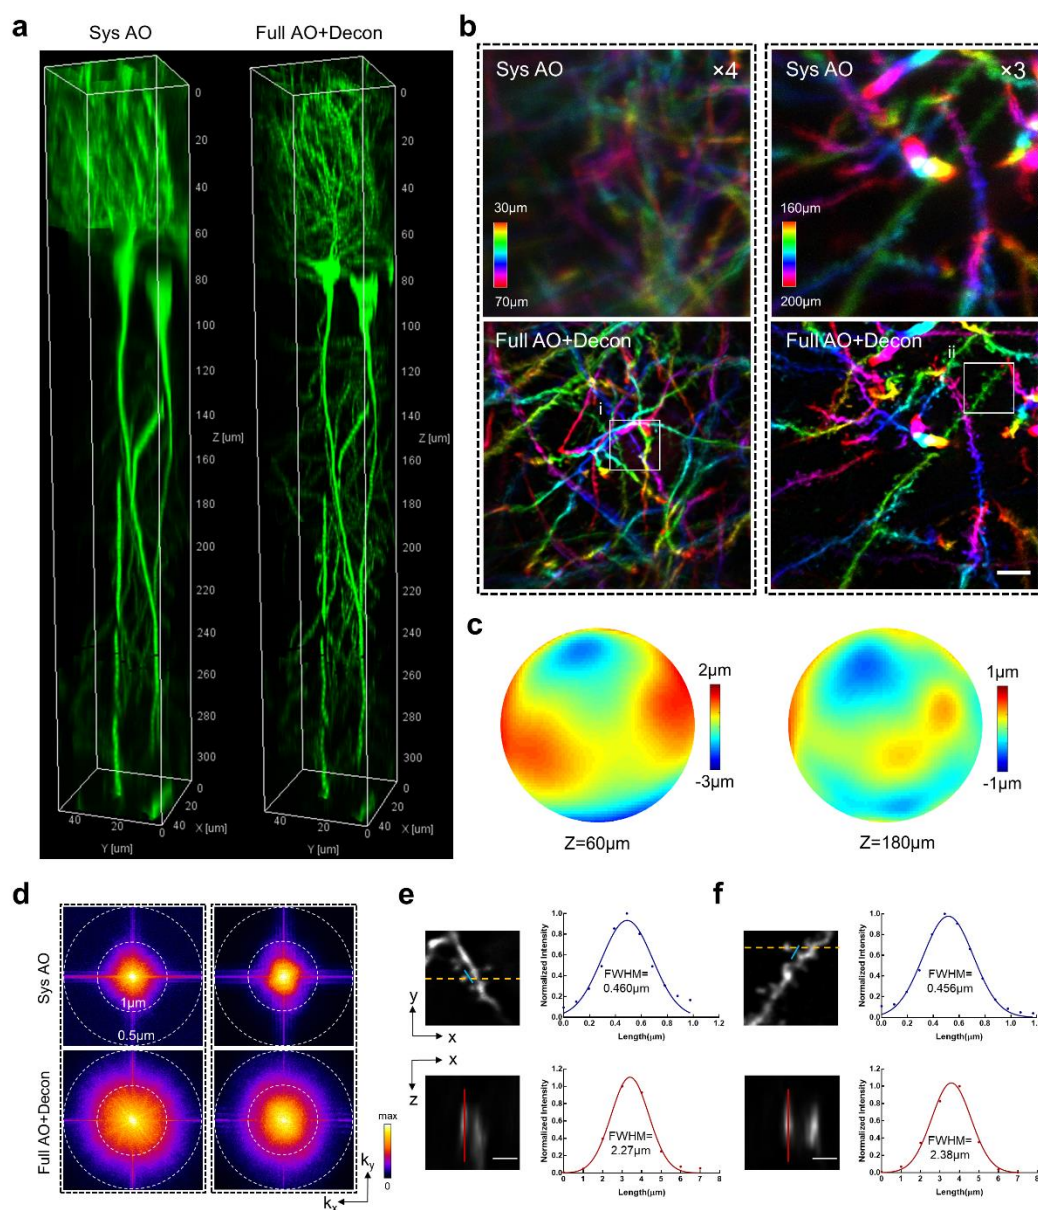

127  
 128 **Figure 1. Direct-wavefront-sensing AO effectively restores diffraction-limited resolution at depth**  
 129 **during *in vivo* brain imaging.** (a) 3D reconstruction of a column (center located at  $r=60 \mu\text{m}$ ) of  
 130 hippocampal CA1 pyramidal neurons in Thy1-GFP mice imaged with our two-photon endomicroscope with  
 131 system correction only (left) and with full correction plus subsequent deconvolution (right). Full AO  
 132 correction is performed every 30  $\mu\text{m}$  of depth. (b) Depth-color-coded xy maximum-intensity projection  
 133 (MIP) of the stack images (left column: 30-70  $\mu\text{m}$ , right column: 160-200  $\mu\text{m}$ ) from 3D images in Fig. 1(a).  
 134 The images with system correction have been digitally enhanced fourfold and threefold as indicated for

135 better visualization. Scale bar: 5  $\mu\text{m}$ . (c) Corrective wavefronts of the DM used for full AO correction of  
136 the stack images in (b). (d) Spectral power in spatial frequency space ( $k_x, k_y$ ) for the images in (b). (e-f)  
137 Magnified views of the dendritic spines corresponding to the boxed regions (i-ii) in (b). The spines are  
138 shown in lateral (xy) and axial (xz) view. The axial view is shown through the plane defined by the yellow  
139 dashed line. Intensity profiles along the blue and red lines are plotted with the curve fitted by a Gaussian  
140 function. Scale bar: 2  $\mu\text{m}$ .

141  
142 Next we sought to investigate the extent to which our AO approach can enlarge the imaging  
143 FOV *in vivo*. Because the aberrations vary from site to site, we performed AO correction in a  
144 number of subregions of  $50 \times 50 \mu\text{m}^2$  each separated by a distance of 30  $\mu\text{m}$  laterally and stitched  
145 these subregions together to form a high-resolution image of large FOV. Considering that the  
146 photon budget and fluorescence may be too weak for wavefront measurement, we propose a  
147 lookup table method to precompensate for the aberrations in wavefront measurement  
148 (**Supplementary Fig. 6**). We found that the corrective wavefront from the lookup table serves as  
149 a close approximation of the optimal wavefront measured *in vivo* (**Fig. 2**). The lookup table method  
150 can greatly boost the fluorescence signal above and beyond system correction and thus  
151 significantly decrease the exposure time required for direct wavefront measurement. Due to the  
152 large off-axis aberrations of the GRIN lens, the imaging FOV with only system correction was  
153 restricted to a small central region ( $<100 \mu\text{m}$  in diameter) of poor resolution (**Fig. 3a** and  
154 **Supplementary Fig. 7a**). After AO full correction, the effective FOV was enlarged to 300  $\mu\text{m}$   
155 together with the recovery of synaptic resolution. The neuronal structures including somata,  
156 dendrites and individual spines can be clearly visualized across the entire FOV, covering all layers  
157 of the hippocampus CA1 region (**Fig. 3b** and **Supplementary Fig. 7b**).

158

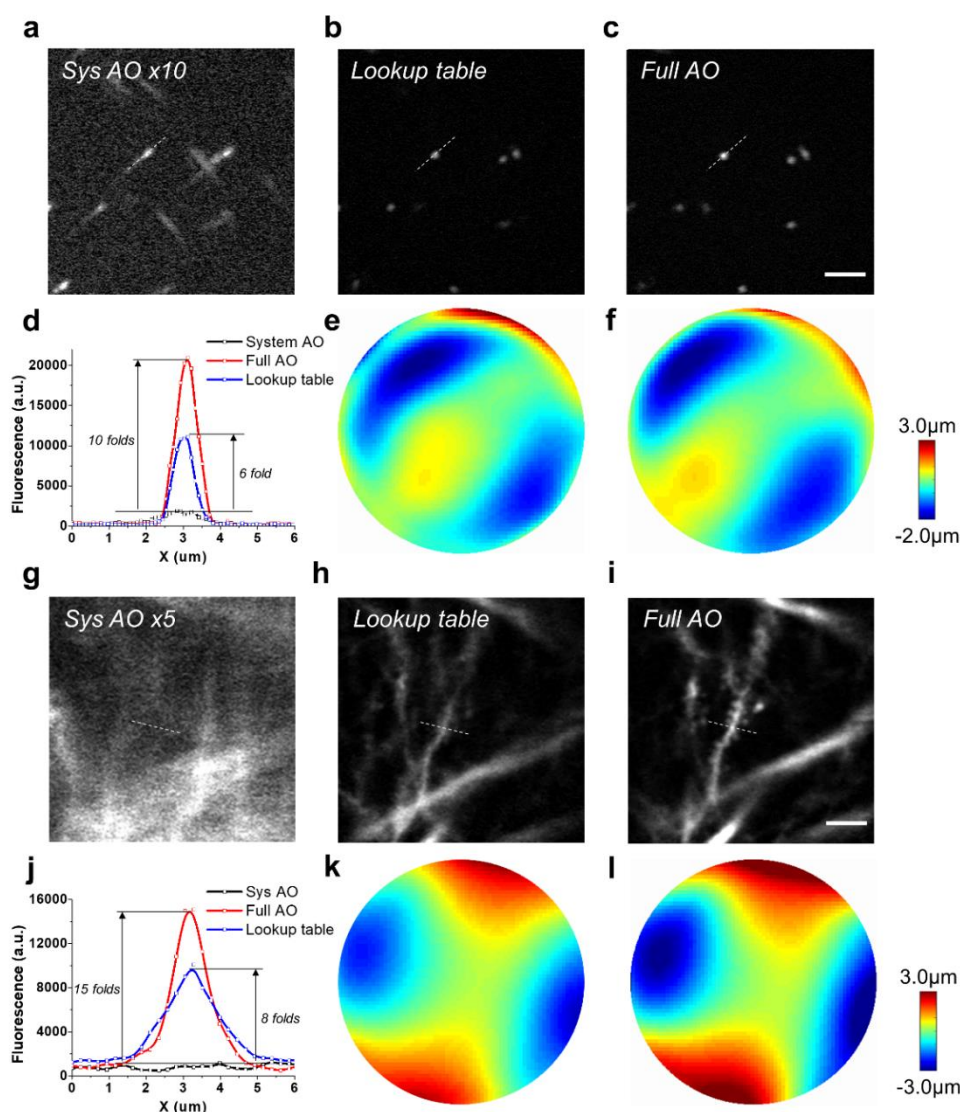

159  
 160 **Figure 2. Lookup-table-based precompensation for GRIN lens aberrations. (a-f)** *In vitro* imaging  
 161 using fluorescent beads of 0.2 μm in diameter. (a-c) Fluorescent images with system AO correction (a),  
 162 lookup table correction (b) and full AO correction (c). (d) Intensity profile along the dashed lines in (a-c).  
 163 (e-f) The corrective wavefront used in lookup table correction (b) and full AO correction (c). (g-i) *In vivo*  
 164 imaging of hippocampal neurons in mice. (g-i) Fluorescent images with system AO correction (g), lookup  
 165 table correction (h) and full AO correction (i). Scale bar: 5 μm. (j) Intensity profile along the dashed lines  
 166 in (g-i). (k-l) The corrective wavefront used in lookup table correction (h) and full AO correction (i).

167  
 168 Taking advantage of our approach, we further investigated the neuronal plasticity of the  
 169 hippocampus under various pathological conditions via *in vivo* time-lapse imaging of the dendritic  
 170 and spine dynamics. We first demonstrated the dendritic alteration in response to the neuronal  
 171 injury induced by a laser-mediated microsurgery. We found that micro-lesion of single dendritic  
 172 shaft will trigger recurrent spinogenesis in the neighboring regions, whereas cutting the dendritic  
 173 branches with laser will lead to prolonged degeneration of the injured dendrites (**Supplementary**  
 174 **Fig. 8**). In addition, we also monitored the spine dynamics in mice with kainic acid-induced

175 epileptic seizure. In contrast to the dynamic neuronal changes induced by laser microsurgery, our  
176 findings show that the changes in spine stability caused by kainic acid-induced epileptic seizure  
177 are insignificant, which is in agreement with another study of the hippocampus of mice  
178 experiencing pilocarpine-induced epileptic seizure<sup>28</sup>. These results shed light on the neuronal  
179 mechanisms underlying neurodegenerative disorders.

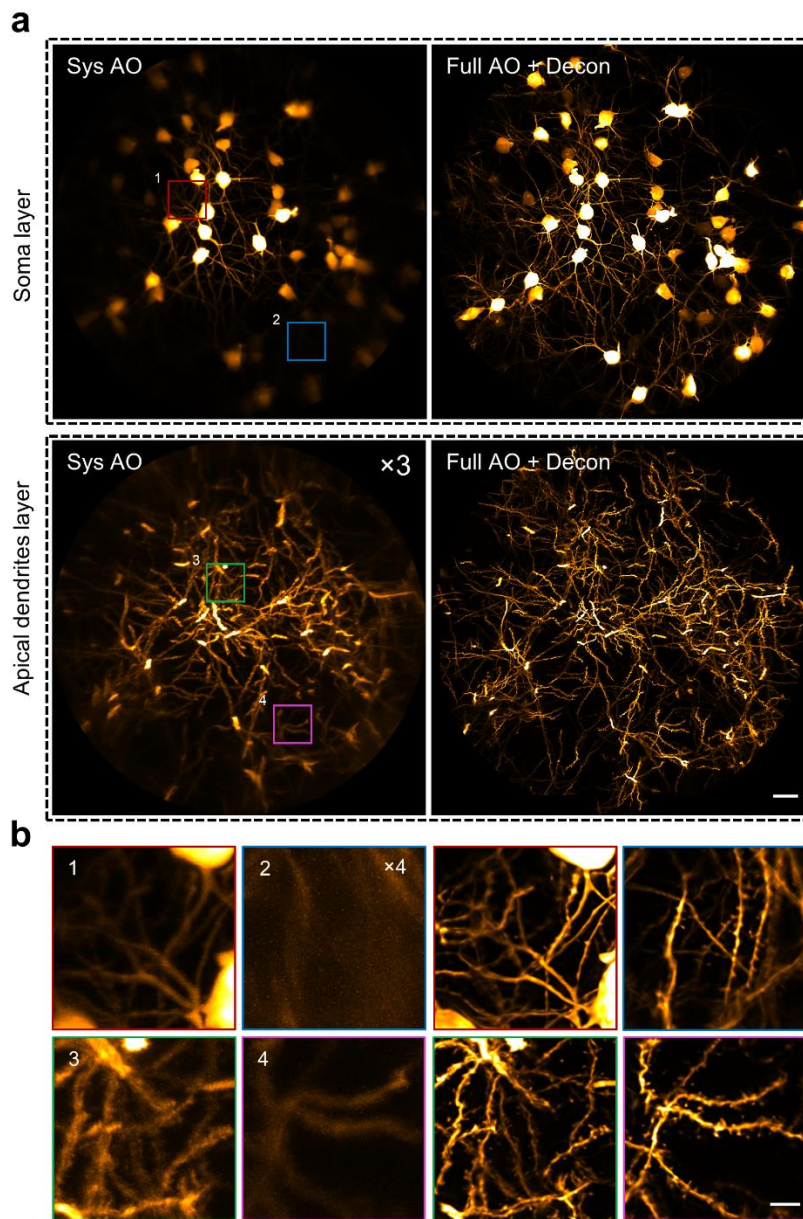

180  
181 **Figure 3. AO two-photon endomicroscope enables *in vivo* imaging of the mouse hippocampus at**  
182 **synaptic resolution over a large FOV.** (a) MIP images of different layers of hippocampal CA1 pyramidal  
183 neurons in Thy1-GFP mice with only system correction (left column) and with full correction plus  
184 subsequent deconvolution (right column). Depth range of projection for soma layer: 90-120  $\mu\text{m}$ ; apical  
185 dendrite layer: 160-190  $\mu\text{m}$ . The images with system correction were enhanced for better visualization.  
186 Scale bar: 20  $\mu\text{m}$ . (b) Left: four magnified views of the sub-regions indicated by the numbered boxes in (a).  
187 Right: views of corresponding sub-regions with full AO corrections. Scale bar: 5  $\mu\text{m}$ .

188

189 In addition to morphological imaging, we further applied the AO two-photon  
190 endomicroscope to the *in vivo* functional calcium imaging of pyramidal neurons in the  
191 hippocampus of awake behaving mice that expressed a calcium indicator (AAV-CaMKII-  
192 GCaMP6s). Taking advantage of the large imaging volume provided by AO correction, we  
193 developed a random-access multiplane imaging method that can quickly capture arbitrarily  
194 selected regions of interest (ROIs) across the effective imaging space (**Fig. 4a**). The galvanometer  
195 scanners were programmed to scan the ROIs sequentially and an electrically tunable lens (ETL)  
196 was synchronized with the scanners for fast switching between imaging planes (**Fig. S9**). To  
197 recover the optimal imaging performance in all the ROIs, the wavefront distortion in each ROI  
198 was measured individually and the corrective pattern of DM was synchronously updated to  
199 compensate for the field-dependent aberrations (**Supplementary Fig. 9**). After AO full corrections  
200 in ROIs, the imaging system can clearly resolve the tightly-packed neurons with the calcium  
201 transients accurately recorded and without interference from the neighboring neurons (**Fig. 4d-f**)  
202 Moreover, the fine neurites and individual spines contaminated by the neuropil background can be  
203 easily distinguished owing to the greatly enhanced resolution and fluorescence intensity (**Figs. 4b-**  
204 **c**). The results demonstrate that our AO approach provides an accurate and sensitive  
205 characterization of neuronal activity and enables simultaneous calcium imaging of neuronal  
206 somata and dendrites at synaptic resolution.



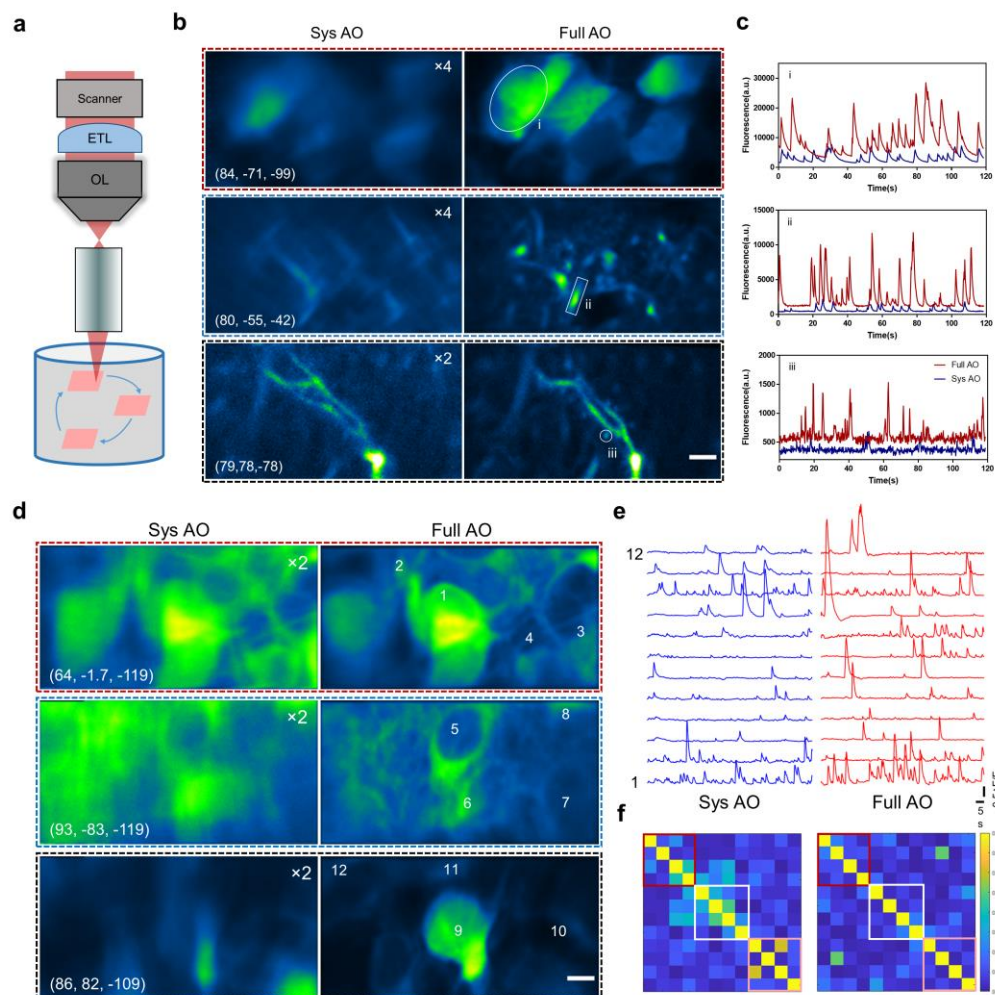

207

208 **Figure 4. Random-access multiplane  $\text{Ca}^{2+}$  imaging of hippocampal neurons *in vivo*.** (a) Schematic  
 209 diagram of random-access multiplane imaging. Three image planes over the entire imaging volume of  
 210  $0.3 \times 0.3 \times 0.3 \text{ mm}^3$  can be randomly selected and sequentially scanned at 5 Hz with synchronized ETL and  
 211 xy galvanometer scanners. (b) Multiplane  $\text{Ca}^{2+}$  imaging of neuronal somata, dendrites and spines at various  
 212 locations with system correction (left) and with full correction (right). The virus AAV-CaMKII-GCaMP6s  
 213 was injected into the hippocampus CA1 of C57/B6 mice. Images are shown as average-intensity projection  
 214 of 600 frames. The images with system correction were enhanced as indicated for better visualization. The  
 215 cylinder coordinates: ( $\mu\text{m}$ , deg,  $\mu\text{m}$ ). Scale bar: 5  $\mu\text{m}$ . (c) Fluorescence traces for the ROIs indicated in (b).  
 216 (d)  $\text{Ca}^{2+}$  imaging of pyramidal neurons in hippocampus CA1 with system and full AO correction. Images are  
 217 shown as average-intensity projections of 600 frames. Scale bar: 5  $\mu\text{m}$ . (e) Calcium transients ( $\Delta F/F$ ) of the  
 218 selected neurons as shown in (a). (f) Correlation coefficient matrices calculated from  $\Delta F/F$  traces of all neurons  
 219 in (b). Colored boxes refer to the three ROIs as shown in (a).  
 220

221 We then applied this AO-assisted functional imaging technology to investigate the  
 222 relationship between somatic and dendritic activity in mouse hippocampus CA1. The soma and  
 223 two apical dendrites of single pyramidal neuron were targeted for simultaneous calcium imaging  
 224 (Figs. 5a-b). We found that the dendritic and somatic signals are highly correlated, despite their  
 225 amplitudes and kinetics are largely different (Fig. 5c-e). This functional correlation of dendrites

226 and neuronal somata has also been reported in the cortex of awake mouse, in which the persistent  
 227 coupling of somato-dendritic activity is unchanged by stimuli and mouse locomotion<sup>29</sup>. Our further  
 228 results show that the correlated somato-dendritic activity in mouse hippocampus is brain-state  
 229 dependent. In compared with full wakefulness, isoflurane-induced light anesthesia will not only  
 230 weaken the activity of different neuronal compartments but also disrupt the somato-dendritic  
 231 correlation (**Supplementary Fig. 10**). In future work, it would be of great interest to extend this  
 232 method to study the dendritic integration in awake mice performing behavioral tasks<sup>30,31</sup>.

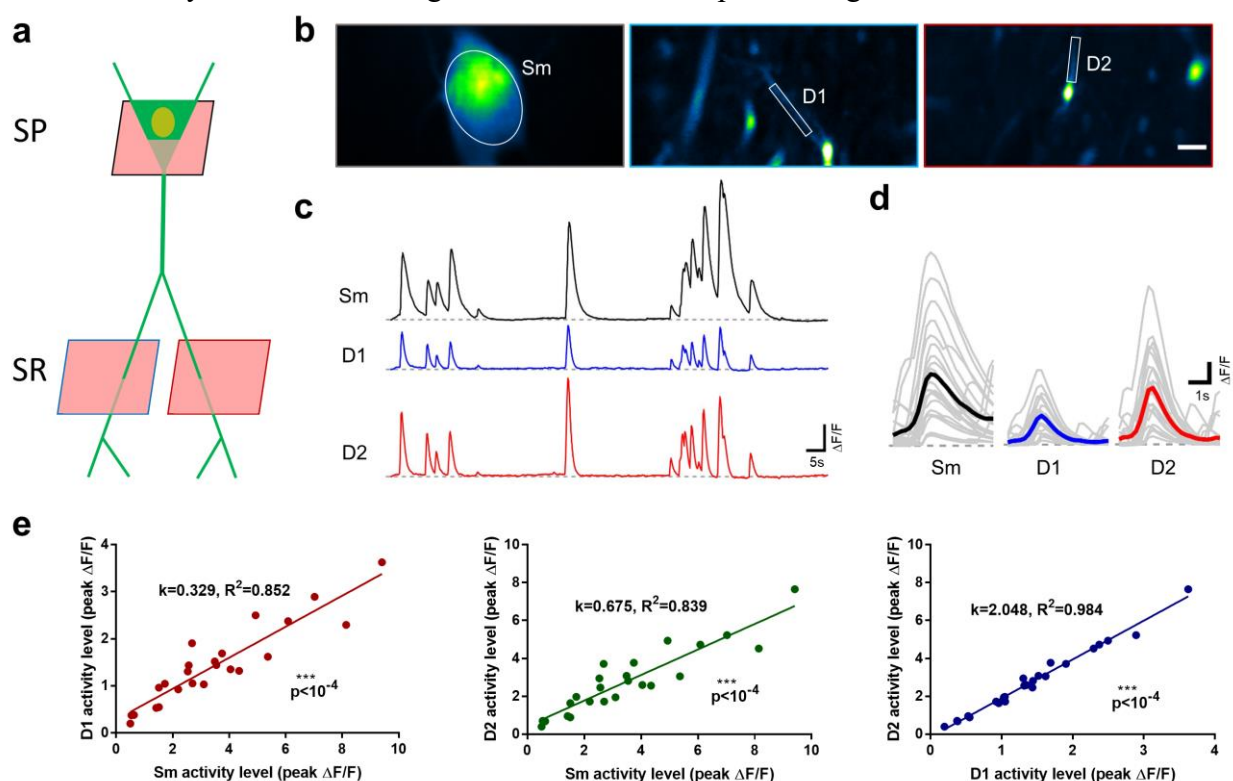

233  
 234 **Figure 5. AO-assisted multiplane  $\text{Ca}^{2+}$  imaging of somato-dendritic activity in hippocampus CA1.** (a)  
 235 Experimental approach to target the dendrites and soma for single neuron recording in hippocampus CA1.  
 236 SP: stratum pyramidale, SR: stratum radiatum. (b) Quasi-simultaneous  $\text{Ca}^{2+}$  imaging of spontaneous  
 237 activity from the soma (Sm) and two dendrites (D1, D2) in awake behaving mice. Images are shown as  
 238 standard-deviation (STD) projection of 600 frames. Scale bar:  $5\mu\text{m}$ . (c) Calcium transients ( $\Delta F/F$ ) of the  
 239 soma and dendrites as shown in (b). (d) Firing events of soma (Sm) and dendrites (D1, D2) as shown in (b).  
 240 Grey and colored curves represents the individual and average event, respectively. (e) Relationship between  
 241 activity strength of the soma-dendrite pairs and dendrite-dendrite pair.

242  
 243  
 244  
 245  
 246  
 247  
 248  
 249

### 250 3. CONCLUSION

251 In this work, we combined the AO technique based on the direct wavefront sensing of the  
252 TPEF guide star with a high-NA endomicroscope, which enables the recovery of diffraction-  
253 limited resolution over large imaging volumes. Using this system, we achieved *in vivo*  
254 morphological imaging of pyramidal neurons at synaptic resolution across all layers of mouse  
255 hippocampus CA1. Moreover, by integrating the system with a random-access multiplane imaging  
256 technique, we demonstrated quasi-simultaneous calcium imaging of separately distributed somata  
257 and the dendrites in the hippocampus of awake behaving mice. The AO endomicroscope can also  
258 benefit the imaging of other deep brain structures such as the striatum, the substantia nigra and the  
259 hypothalamus<sup>32</sup>. It should be noted that although brain tissue can be surgically removed and  
260 replaced with a cannula window<sup>33</sup> or glass plug<sup>34</sup> to provide direct optical access, the procedure  
261 requires removing too much tissue and is not applicable to deep brain imaging. An endomicroscope  
262 based on a miniature GRIN lens provides an approach to deep brain imaging with minimized  
263 trauma, but suffers from poor resolutions due to the inherent aberrations of the GRIN lens. One  
264 way to solve this problem directly is by adding an extra lens inside the GRIN lens assembly to  
265 correct the off-axis aberrations<sup>35</sup>. However, the GRIN lens is only optimized at the designed  
266 working distance. For *in vivo* imaging where the GRIN lens remains fixed in the biological samples,  
267 3D imaging is achieved by changing the laser convergence entering the GRIN lens, which could  
268 lead to severe aberrations when the focus deviates from the designed working plane. Our AO  
269 endomicroscope, on the other hand, provides a versatile approach for correcting the aberrations of  
270 various GRIN lenses with suboptimal design. This study demonstrates the great potential of the  
271 AO two-photon endomicroscope to facilitate neuroscience research in the deeper regions of the  
272 brain.

273

274

275

### 276 References

277

- 278 1. Helmchen, F. & Denk, W. Deep tissue two-photon microscopy. *Nature Methods* **2**, 932–940 (2005).
- 279 2. Svoboda, K. & Yasuda, R. Principles of Two-Photon Excitation Microscopy and Its Applications to  
280 Neuroscience. *Neuron* **50**, 823–839 (2006).
- 281 3. Horton, N. G. *et al.* In vivo three-photon microscopy of subcortical structures within an intact mouse brain.  
282 *Nature Photonics* **7**, 205–209 (2013).
- 283 4. Tischbirek, C., Birkner, A., Jia, H., Sakmann, B. & Konnerth, A. Deep two-photon brain imaging with a red-  
284 shifted fluorometric Ca<sup>2+</sup> indicator. *Proceedings of the National Academy of Sciences* **112**, 11377–11382  
285 (2015).

- 286 5. Barretto, R. P. J., Messerschmidt, B. & Schnitzer, M. J. In vivo fluorescence imaging with high-resolution  
287 microlenses. *Nature Methods* **6**, 511–512 (2009).
- 288 6. Barretto, R. P. J. *et al.* Time-lapse imaging of disease progression in deep brain areas using fluorescence  
289 microendoscopy. *Nature Medicine* **17**, 223–228 (2011).
- 290 7. Lecoq, J. *et al.* Visualizing mammalian brain area interactions by dual-axis two-photon calcium imaging. *Nat*  
291 *Neurosci* **17**, 1825–1829 (2014).
- 292 8. McHenry, J. A. *et al.* Hormonal gain control of a medial preoptic area social reward circuit. *Nat Neurosci* **20**,  
293 449–458 (2017).
- 294 9. Kamigaki, T. & Dan, Y. Delay activity of specific prefrontal interneuron subtypes modulates memory-guided  
295 behavior. *Nat Neurosci* **20**, 854–863 (2017).
- 296 10. Roy, D. S. *et al.* Distinct Neural Circuits for the Formation and Retrieval of Episodic Memories. *Cell* **170**,  
297 1000-1012.e19 (2017).
- 298 11. Attardo, A., Fitzgerald, J. E. & Schnitzer, M. J. Impermanence of dendritic spines in live adult CA1  
299 hippocampus. *Nature* **523**, 592–596 (2015).
- 300 12. Zong, W. *et al.* Fast high-resolution miniature two-photon microscopy for brain imaging in freely  
301 behaving mice. *Nature Methods* **14**, 713–719 (2017).
- 302 13. Booth, M. J. Adaptive optical microscopy: the ongoing quest for a perfect image. *Light: Science &*  
303 *Applications* **3**, e165–e165 (2014).
- 304 14. Ji, N. Adaptive optical fluorescence microscopy. *Nature Methods* **14**, 374–380 (2017).
- 305 15. Aviles-Espinosa, R. *et al.* Measurement and correction of in vivo sample aberrations employing a  
306 nonlinear guide-star in two-photon excited fluorescence microscopy. *Biomed. Opt. Express*, *BOE* **2**, 3135–  
307 3149 (2011).
- 308 16. Tao, X. *et al.* Adaptive optics microscopy with direct wavefront sensing using fluorescent protein guide  
309 stars. *Opt. Lett.* **36**, 3389 (2011).
- 310 17. Wang, K. *et al.* Rapid adaptive optical recovery of optimal resolution over large volumes. *Nature*

- 311 *Methods* **11**, 625–628 (2014).
- 312 18. Wang, K. *et al.* Direct wavefront sensing for high-resolution in vivo imaging in scattering tissue. *Nature*  
313 *Communications* **6**, 7276 (2015).
- 314 19. Liu, R., Li, Z., Marvin, J. S. & Kleinfeld, D. Direct wavefront sensing enables functional imaging of  
315 infragranular axons and spines. *Nat Methods* **16**, 615–618 (2019).
- 316 20. Débarre, D. *et al.* Image-based adaptive optics for two-photon microscopy. *Optics Letters* **34**, 2495  
317 (2009).
- 318 21. Ji, N., Milkie, D. E. & Betzig, E. Adaptive optics via pupil segmentation for high-resolution imaging in  
319 biological tissues. *Nature Methods* **7**, 141–147 (2010).
- 320 22. Tang, J., Germain, R. N. & Cui, M. Superpenetration optical microscopy by iterative multiphoton  
321 adaptive compensation technique. *Proceedings of the National Academy of Sciences* **109**, 8434–8439 (2012).
- 322 23. Wang, C. & Ji, N. Pupil-segmentation-based adaptive optical correction of a high-numerical-aperture  
323 gradient refractive index lens for two-photon fluorescence endoscopy. *Opt. Lett., OL* **37**, 2001–2003 (2012).
- 324 24. Wang, C. & Ji, N. Characterization and improvement of three-dimensional imaging performance of  
325 GRIN-lens-based two-photon fluorescence endomicroscopes with adaptive optics. *Optics Express* **21**, 27142  
326 (2013).
- 327 25. Cha, J. W., Ballesta, J. & So, P. T. C. Shack-Hartmann wavefront-sensor-based adaptive optics system for  
328 multiphoton microscopy. *J. Biomed. Opt.* **15**, 046022 (2010).
- 329 26. Neves, G., Cooke, S. F. & Bliss, T. V. P. Synaptic plasticity, memory and the hippocampus: a neural  
330 network approach to causality. *Nature Reviews Neuroscience* **9**, 65–75 (2008).
- 331 27. Benavides-Piccione, R. *et al.* Differential Structure of Hippocampal CA1 Pyramidal Neurons in the  
332 Human and Mouse. *Cerebral Cortex* bhz122 e16553 e41714 e1000781 (2019) doi:10.1093/cercor/bhz122.
- 333 28. Mizrahi, A. High-Resolution In Vivo Imaging of Hippocampal Dendrites and Spines. *Journal of*  
334 *Neuroscience* **24**, 3147–3151 (2004).
- 335 29. Beaulieu-Laroche, L., Toloza, E. H. S., Brown, N. J. & Harnett, M. T. Widespread and Highly Correlated

- 336 Somato-dendritic Activity in Cortical Layer 5 Neurons. *Neuron* **103**, 235-241.e4 (2019).
- 337 30. Stuart, G. J. & Spruston, N. Dendritic integration: 60 years of progress. *Nat Neurosci* **18**, 1713–1721  
338 (2015).
- 339 31. Sheffield, M. E. J. & Dombeck, D. A. Calcium transient prevalence across the dendritic arbour predicts  
340 place field properties. *Nature* **517**, 200–204 (2015).
- 341 32. Bocarsly, M. E. *et al.* Minimally invasive microendoscopy system for in vivo functional imaging of deep  
342 nuclei in the mouse brain. *Biomedical Optics Express* **6**, 4546 (2015).
- 343 33. Dombeck, D. A., Harvey, C. D., Tian, L., Looger, L. L. & Tank, D. W. Functional imaging of hippocampal  
344 place cells at cellular resolution during virtual navigation. *Nature Neuroscience* **13**, 1433–1440 (2010).
- 345 34. Velasco, M. G. M. & Levene, M. J. In vivo two-photon microscopy of the hippocampus using glass plugs.  
346 *Biomed Opt Express* **5**, 1700–1708 (2014).
- 347 35. Matz, G., Messerschmidt, B. & Gross, H. Design and evaluation of new color-corrected rigid  
348 endomicroscopic high NA GRIN-objectives with a sub-micron resolution and large field of view. *Opt. Express*  
349 **24**, 10987 (2016).
- 350 36. Park, J.-H., Kong, L., Zhou, Y. & Cui, M. Large-field-of-view imaging by multi-pupil adaptive optics.  
351 *Nature Methods* **14**, 581–583 (2017).
- 352 37. Thompson, R. E., Larson, D. R. & Webb, W. W. Precise Nanometer Localization Analysis for Individual  
353 Fluorescent Probes. *Biophysical Journal* **82**, 2775–2783 (2002).
- 354 38. Schindelin, J. *et al.* Fiji: an open-source platform for biological-image analysis. *Nat Methods* **9**, 676–682  
355 (2012).
- 356 39. Thévenaz, P. & Unser, M. User-friendly semiautomated assembly of accurate image mosaics in  
357 microscopy. *Microscopy Research and Technique* **70**, 135–146 (2007).
- 358 40. Preibisch, S., Saalfeld, S. & Tomancak, P. Globally optimal stitching of tiled 3D microscopic image  
359 acquisitions. *Bioinformatics* **25**, 1463–1465 (2009).

360

361

362 **Acknowledgements**

363 This work was supported by the Hong Kong Research Grants Council through grants 662513, 16103215, 16148816,  
364 16102518, T13-607/12R, T13-706/11-1, T13-605/18W, C6002-17GF, C6001-19EF, N\_HKUST603/19 and the  
365 Innovation and Technology Commission (ITCPD/17-9), and the Area of Excellence Scheme of the University Grants  
366 Committee (AoE/M-604/16, AOE/M-09/12) and the Hong Kong University of Science & Technology (HKUST)  
367 through grant RPC10EG33

368

369 **Author contributions**

370 Z.Q., C.C. and J.Y.Q. conceived of the research idea. C.C. and Z.Q. designed and conducted the experiments and data  
371 analysis. Z.Q., S.H. and C.C. built the AO two-photon and multiplane imaging system. Y.W. and K.F.T. carried out  
372 the surgery of virus injection and GRIN lens implantation. C.C. and Z.Q. took the lead in writing the manuscript with  
373 inputs from all other authors.

374

375 **Competing interests**

376 All authors declare that they have no competing interests.

377

## 378 **Methods**

379 **Adaptive optics two-photon endomicroscopy.** The schematic of our home-built AO two-photon  
380 endomicroscopy system is shown in **Supplementary Fig. 1**. The beam of a tunable mode-locked  
381 femtosecond laser (Coherent, Mira 900) was expanded by a pair of achromatic lens to slightly  
382 overfill the aperture of the DM (Alpao, DM97-15). The DM was conjugated to the 5 mm  
383 galvanometric *x*-scanning mirror (Cambridge Technology, 6215H) by a  $4f$  telescope formed by  
384 two VIS-NIR achromatic doublets L3 and L4 (Edmunds, 49-365 and 49-794). Two scanning  
385 mirrors were mutually conjugated by the lens pair L5 and L6, each of which consisted of two  
386 doublets (Edmunds, 49-392). Finally, the galvanometric *y*-scanning mirror was conjugated to the  
387 back focal plane of the objective by a  $4f$  relay formed by the scan lens L7 (consisting of two  
388 doublets (Edmunds, 49-391)) and the tube lens L8 (Edmunds, 49-393). A  $10\times$  air objective (Carl  
389 Zeiss, Plan-Apochromat, NA=0.45) was used to match the image NA of the GRIN lens  
390 (GRINTECH GmbH, GT-MO-080-0415-810, image NA=0.415, object NA=0.8) and mounted on  
391 an encoded translation stage (Thorlabs, LNR50SEK1) for axial sectioning. Precise alignment was  
392 carried out to ensure that the objective and the GRIN lens shared the same optical axis.

393 For two-photon imaging, the fluorescence emission signal collected by the GRIN lens and the  
394 objective was directed to the photo-detection unit via dichroic mirror D2 (Semrock, FF705-Di01-  
395 25 $\times$ 36). Then the fluorescence was separated by dichroic mirror D3 (Semrock, FF560-Di01-25 $\times$ 36)  
396 into a red and a green channel. The band-pass filters F2 (Semrock, FF01-525/50) and F3 (Semrock,  
397 FF01-593/46) were placed before the current photomultiplier tube (PMT) modules (Hamamatsu,  
398 H11461-01 and H11461-03) to select a particular wavelength range of detection. The  
399 corresponding PMT signal was then fed into a current amplifier (Stanford Research, SR570 and  
400 Femto, DLPCA-200) and subsequently into a data acquisition device (National instrument, PCIe-  
401 6353) controlled with custom-written software.

402 For wavefront sensing, D2 was switched to another dichroic mirror (Semrock, Di02-R488-  
403 25 $\times$ 36) using a motorized flipper (Thorlabs, MFF101/M) so that the guide star signal of  
404 fluorescence emission can transmit through D2 and be descanned by the galvanometer scanning  
405 mirrors. Then the fluorescence signal was reflected by the DM and separated from the excitation  
406 laser by dichroic mirror D1 (Semrock, FF705-Di01-25 $\times$ 36). The DM was conjugated to the  
407 microlens array (SUSS MicroOptics, 18-00197) of the SHWS by the lens pair L9 and L10  
408 (Throlabs, AC254-200-A and AC254-100-A). An ultra-sensitive EMCCD (Andor, iXon3 888) was  
409 placed in the focal plane of the microlens array to capture the spot pattern, which provides direct  
410 measurement of the wavefront distortion. Overall, the DM, the galvanometer scanning mirrors, the  
411 back focal plane of the objective and the microlens array of SHWS are all mutually conjugated via  
412 the  $4f$  relay system.

413  
414 **Calibration of the deformable mirror.** The DM was calibrated before it was integrated into the  
415 microscope system. Following a previously reported procedure<sup>14</sup>, the driving voltage pattern of  
416 the DM for the first 65 of Noll's Zernike modes was measured using a home-built Michelson  
417 interferometer. In this way, the DM can be controlled to take any desired shape via a linear  
418 combination of these Zernike modes.

419  
420 **System AO correction.** The aberrations of the microscope system were corrected before any  
421 imaging experiment. First, the  $10\times$  air objective and the GRIN lens were replaced by another  
422 objective with nearly aberration-free performance (Olympus, XLPLN25XWMP2, 25X, 1.05 NA)  
423 such that the measured aberrations would mainly come from the imperfections of the optical



424 components or alignments of the system. Then the two-photon fluorescence intensity of a  
425 fluorescent dye (rhodamine 6G) solution was used as the feedback to optimize the shape of the  
426 DM. Here, a Zernike-mode-based sensorless AO algorithm<sup>15</sup> was adopted. Briefly, seven to nine  
427 different values of each Zernike mode were applied to the DM and the corresponding fluorescence  
428 intensity was fitted with a Gaussian function to find the optimal value. This procedure was repeated  
429 for the first 21 Zernike modes (tip, tilt and defocus excluded) and the system aberration  $\mathbf{Z}_{\text{sys}}$  could  
430 be measured and compensated.

431  
432 **Calibration of the wavefront sensor.** The SHWS was calibrated with respect to the DM in the  
433 microscope system. The femtosecond laser was focused by the 25 $\times$  water objective to excite a  
434 fluorescent dye (rhodamine 6G) solution, which created a nonlinear fluorescent guide star. The  
435 light of the guide star was shaped by the DM and then sent to the SHWS, which formed the closed-  
436 loop AO system. The influence matrix  $\mathbf{M}_{\text{SZ}}$  of the DM on the SHWS was calibrated by sequentially  
437 applying the first 65 Zernike modes to the DM and recording the corresponding spot displacement  
438 in the SHWS. The rows of  $\mathbf{M}_{\text{SZ}}$  represent the shift in spot position on the SHWS in response to  
439 each Zernike mode and formed the basis on which the *in vivo* wavefront measurement can be  
440 decomposed. In this work, we chose the modal wavefront reconstruction algorithm because 1) the  
441 aberration is averaged over a small volume and thus is mainly of low order; 2) this algorithm is  
442 robust to the noise and missing spots in the *in vivo* wavefront measurement<sup>14</sup>; and 3) each Zernike  
443 mode has well defined physically meanings such as astigmatism, coma, and spherical aberration,  
444 making the interpretation of GRIN lens aberrations explicit.

445  
446 **Full AO correction.** The full AO correction started with the system aberration corrected and  
447 further compensated for the aberrations of the GRIN lens and those induced by biological samples.  
448 The reference spot pattern on SHWS  $\mathbf{S}_{\text{ref}} = (x_1 \cdots x_N, y_1 \cdots y_N)$  was recorded using the  
449 fluorescence signal of rhodamine at the FOV center of the endomicroscope with aberration  
450 corrected by the sensorless algorithm described above. For *in vivo* aberration measurement, the  
451 femtosecond laser was scanned over a small FOV (30  $\mu\text{m} \times 30 \mu\text{m}$ ) and the excited fluorescence  
452 signal was descanned and integrated at the SHWS. The spot location of the *in vivo* SHWS  
453 measurement  $\mathbf{S}_{\text{all}}$  was estimated using a Gaussian-fit centroid algorithm<sup>16</sup> and the reliability  
454 weight of each spot was determined by its signal-to-background ratio  $\mathbf{W} =$   
455  $\text{Diag}(w_1 \cdots w_N, w_1 \cdots w_N)$ . The spot displacement of the *in vivo* measurement relative to the  
456 reference position was calculated as  $\Delta\mathbf{S} = \mathbf{S}_{\text{all}} - \mathbf{S}_{\text{ref}}$ . Then the additional corrective pattern of the  
457 DM could be computed by minimizing the total aberration as follows:

$$458 \quad \Delta\mathbf{Z} = \arg \min \|\mathbf{W}^{1/2}(\mathbf{M}_{\text{SZ}}\Delta\mathbf{Z} + \Delta\mathbf{S})\|^2 = -(\mathbf{M}_{\text{SZ}}^T \mathbf{W} \mathbf{M}_{\text{SZ}})^{-1} \mathbf{M}_{\text{SZ}}^T \mathbf{W} \Delta\mathbf{S}.$$

459 The full AO correction pattern applied to the DM was  $\mathbf{Z}_{\text{full}} = \mathbf{Z}_{\text{sys}} + \Delta\mathbf{Z}$ . In this paper, all of the  
460 plotted wavefront distortions represent the aberrations induced by the GRIN lens and biological  
461 samples, i.e.  $\Delta\mathbf{Z}$ .

462  
463 **Animal preparation.** C57 (C57BL/6J) and Thy1-GFP (Tg(Thy1-EGFP)MJrs/J) mice were  
464 obtained from the Jackson Laboratory. The mice were housed at the Animal and Plant Care Facility  
465 of the Hong Kong University of Science and Technology (HKUST). Mice of the same sex were  
466 housed four per cage with a 12-h light/dark cycle, and food and water *ad libitum*. All animal  
467 procedures were conducted in accordance with the Guidelines of the Animal Care Facility of  
468 HKUST and approved by the Animal Ethics Committee at HKUST.

469

470 *Virus injection.* The AAV9- CaMKII-GCaMP6f virus was obtained from the Penn Vector Core at  
471 the University of Pennsylvania. Virus was diluted 1:10 in PBS and delivered as a bolus (0.5  $\mu$ L) at  
472 50–100 nL min<sup>-1</sup> via a Hamilton syringe into the hippocampal CA1 region (anteroposterior, -2.00  
473 mm; mediolateral,  $\pm$ 1.50 mm; dorsoventral, -1.4 mm; relative to the bregma) in 3–4-month-old  
474 C57 mice. After injection, the needle was kept in place for 10 min and then retracted from the brain.  
475 The mice were then returned to their home cages to recover for 3-4 weeks.

476  
477 *GRIN lens implantation.* Dexamethasone (0.2  $\mu$ g/mg) solution was subcutaneously administered  
478 one hour before the procedure to prevent brain swelling and reduce inflammatory responses. The  
479 mouse was then secured on a stereotaxic instrument and anesthetized with isoflurane (1.5-2% in  
480 oxygen). After the skull was exposed and cleaned with ethanol (70%), three stainless steel screws  
481 were implanted in the skull to form a triangle with the center located over the hippocampus CA1  
482 region for skull stabilization. Then a 1.6-mm-diameter craniotomy was performed at stereotactic  
483 coordinates (2 mm, 1.5 mm) posterior and lateral to the bregma point. Next, the cylindrical column  
484 of the exposed cortex was slowly aspirated and removed using a 27-gauge blunt needle until the  
485 white matter appeared. The GRIN lens was then positioned over the cranial window and gently  
486 inserted into the brain. After a thin layer of adhesive luting cement applied to the skull surrounding  
487 the window had dried and hardened, a small amount of dental cement was used to cover the  
488 exposed skull surface. A custom-designed rectangular head plate with a round hole of clearance  
489 for GRIN lens at the center was then permanently glued to the exposed skull. It would be rigidly  
490 mounted the mouse head on a holding device with angle adjusters (NARISHIGE, MAG-2) during  
491 *in vivo* imaging experiments. After the surgery, the mouse was allowed to recover from the  
492 anesthesia on a heating blanket before returning to its home cage.

493  
494 **Alignment of the GRIN lens.** For *in vitro* and *in vivo* experiments, the sample was mounted on  
495 the rotational stage MAG-2 and further fixed to a three-axis translation stage, which enabled  
496 precise adjustment of the angle and position of the GRIN lens. A visible laser diode was introduced  
497 to the endomicroscopy system to assist the alignment. The laser beam was first aligned with the  
498 optical axis of the objective. Then the objective was removed and the tilt/tip of the GRIN lens was  
499 adjusted so that the laser was normally incident on the upper surface of the GRIN lens. This  
500 guaranteed that the optical axes of the GRIN lens and the objective were parallel to each other.  
501 Next, we looked at the imaging plane of the objective through the eyepiece and translated the  
502 GRIN lens until its upper surface came into focus. Then the objective was lifted 100  $\mu$ m up so that  
503 the GRIN lens could operate at its designed working distance. Finally, we switched to the two-  
504 photon imaging mode and translated the GRIN lens sideways until the fluorescence image  
505 appeared at the center of the FOV.

506  
507 **Lookup table for the aberrations of the GRIN lens.** To evaluate the efficacy of our approach,  
508 we first characterized the intrinsic aberrations of the GRIN lens that was embedded in a  
509 rhodamine/agarose mixture that contains sparsely distributed and immobilized fluorescent beads  
510 (200-nm diameter). Its aberration was measured by the wavefront distortion of rhodamine  
511 fluorescence, whereas the PSF was determined by imaging the individual fluorescent bead. To  
512 achieve the optimal imaging performance, the GRIN lens was precisely aligned to share the same  
513 optical axis with the objective. Considering the cylindrical symmetry of the GRIN lens, the  
514 cylindrical coordinates ( $r$ ,  $\theta$ ,  $z$ ) were adopted to describe the imaging location in the sample where  
515  $z=0$  corresponds to the designed focal plane of the GRIN lens. The representative on-axis and off-

516 axis aberrations of the GRIN lens at various depths are shown in **Supplementary Figs. 2 and 3**,  
517 which are primarily dominated by spherical aberration and astigmatism respectively, consistent  
518 with a previous study<sup>5</sup>. As can be seen from **Supplementary Figs. 2 and 3**, despite the aberrations  
519 increasing rapidly and the PSF becoming severely distorted when the imaging position deviates  
520 from the center point, AO correction can effectively increase the fluorescence signal and recover  
521 the diffraction-limited performance at various depths. Because the optical properties of the GRIN  
522 lens are determined by the optical design and manufacturing process, we can pre-calibrate the  
523 intrinsic aberrations of the GRIN lens and store them in a lookup table. The lookup table was  
524 established using an *in vitro* setup. The detailed imaging parameters were listed in **Supplementary**  
525 **Table 1**. In principle, we need to measure all the aberrations at different field locations.  
526 Considering that the aberrations of the GRIN lens are cylindrically symmetrical along the optical  
527 axis<sup>4,5</sup>, the number of aberration measurements could be greatly reduced. To cover the entire  
528 cylindrical FOV with a radius of 150  $\mu\text{m}$  and a depth of 300  $\mu\text{m}$ , we built the lookup table by  
529 measuring the aberrations along the  $r$  and  $z$  directions at 30  $\mu\text{m}$  intervals, resulting in  $6 \times 11$   
530 wavefront distortions in the  $\theta = 0$  subplane (**Supplementary Fig. 6a**).

531 For *in vivo* imaging, the photon budget is limited and the two-photon fluorescence intensity was  
532 practically too weak for wavefront measurement, especially in the off-axis region of large  
533 aberration. To solve this problem, we precompensated for the aberration of the GRIN lens in the  
534 imaging region  $(r_1, \theta_1, z_1)$  using the lookup table (**Supplementary Fig. 6b**). Firstly, the aberration  
535 of the GRIN lens at location  $(r_1, 0, z_1)$  was estimated from the linear interpolation of the  
536 aberrations nearby stored in the lookup table. Secondly, the aberration at the center was subtracted  
537 from that at  $(r_1, 0, z_1)$ . Lastly, the resulting aberration was rotated by the angle  $\theta_1$  and added to the  
538 aberration at the center, which was the estimated wavefront correction for the ROI  $(r_1, \theta_1, z_1)$ . As  
539 shown in **Fig. 3**, because of the intrinsic aberrations of the GRIN lens were largely corrected by  
540 using the lookup table, the fluorescence intensity and imaging resolution were improved  
541 tremendously. Then we were able to perform *in vivo* AO correction based on direct wavefront  
542 sensing to further eliminate the residual aberrations caused by the alignment error of the GRIN  
543 lens as well as biological tissues.

544  
545 ***In vivo* imaging.** The imaging experiment was performed three weeks after the implantation of  
546 the GRIN lens. The mouse was first briefly anesthetized with isoflurane (1-2% in oxygen) and  
547 mounted on the head-holding device. The GRIN lens was precisely aligned to share the same  
548 optical axis with the objective lens. The femtosecond laser tuned at 920 nm was used to excite  
549 GFP and GCaMP6s. For wavefront sensing, the aberration of the GRIN lens was first  
550 precompensated using the lookup table and the residual aberration was measured and corrected  
551 using the two-photon excited guide star. The laser power was 30~50 mW through the objective  
552 and the exposure time was less than 2 s. Detailed imaging parameters including excitation power,  
553 pixel rate, guide star integration time can be found in **Supplementary Table 2-3**. For the  
554 morphological imaging, the animals were anesthetized with isoflurane (1% in oxygen) with the  
555 head secured on a head-holding stage (NARISHIGE, MAG-2). For calcium imaging, the mice  
556 were fully awake or lightly anesthetized with isoflurane and placed on a head-fixation behavioral  
557 platform that was based on a rotary treadmill.

558  
559 **Laser-mediated neuronal injury.** The field-dependent GRIN lens aberration was first measured  
560 and corrected as previously described to enable precise and efficient laser-mediated microsurgery.  
561 For laser cutting of the dendritic branch, the 920 nm laser with 160-mW power through the

562 objective was line scanned (1s/line) across the branch repeatedly for 20 second. For micro-lesion  
563 of dendritic shaft, the laser with the same optical power was focused on the shaft center for 5  
564 second. The parameters of optical power and duration for laser microsurgery have been optimized  
565 to induce reproducible neuronal injuries.

566  
567 **Induction of epileptic seizure.** After the baseline image was obtained, the mice were allowed to  
568 recovered from the isoflurane anesthesia. Then single high dose (20mg/kg) of kainic acid (Sigma-  
569 Aldrich) dissolved in Dulbecco's Phosphate-Buffered Saline (DPBS) was intraperitoneally (i.p.)  
570 injected to fully awake mice and the mice status epilepticus was quantified by the Racine stages 17.  
571 After the mice progressed to stage 3 or above, they were allowed to stayed in the cage for 30  
572 minutes before the seizure was terminated by isoflurane anesthesia. For control experiment, the  
573 mice received DPBS injection instead of kainic acid.

574  
575 **Multiplane calcium imaging.** An electrically tunable lens (Optotune, EL-16-40-TC-VIS-5D-C)  
576 was placed close to the rear stop of the 10X objective lens for quick tuning of the focal plane. We  
577 first picked three ROIs and measured the wavefront distortion using the method described above.  
578 The three corrective patterns of the DM were stored locally for further use. Next, we conducted  
579 near-simultaneously calcium imaging of the three ROIs at a volume rate of 5 Hz. The ETL and  
580 DM were synchronized with the scanner as shown in **Supplementary Fig. 9**. The driving voltage  
581 of the ETL was low-pass filtered to avoid high-order oscillation and improve the temporal response.  
582 The pre-measured corrective patterns were updated on the DM accordingly to compensate for the  
583 field-dependent aberrations.

584  
585 **Image analysis.** The images were processed in Matlab or ImageJ<sup>18</sup>. For image deconvolution, the  
586 Richardson-Lucy algorithm of the DeconvolutionLab2 plugin in ImageJ was adopted. The PSF  
587 used for deconvolution was experimentally measured at different imaging positions. To make the  
588 PSF measurement less laborious, we took advantage of the cylindrical symmetry of the GRIN lens  
589 and only measured the PSF in the  $\theta = 0$  subplane. The PSF in other regions could be estimated  
590 using the rotation-based procedure. For the mosaic images, multi-tile subimages were stitched  
591 together using either MosaicJ<sup>19</sup> or Grid/Collection Stitching<sup>20</sup> plugin in ImageJ. To cover the entire  
592 FOV of 300  $\mu\text{m}$  in diameter, 81 subimages at 30  $\mu\text{m}$  intervals were acquired.

593

594

595

596

597

598

599

600

601

602 **Supplementary information**

603

604

605

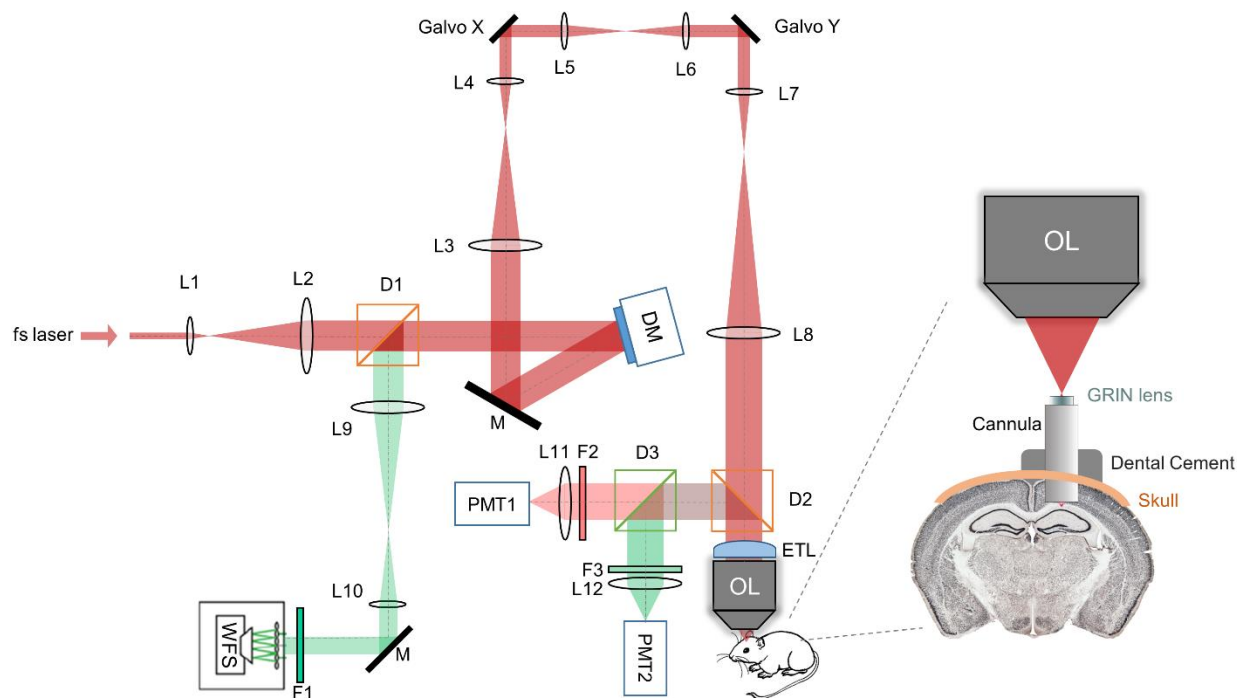

606

607 **Supplementary Figure 1 | Schematic diagram of our AO two-photon endomicroscope system for *in***

608 ***vivo* deep brain imaging.** L1-L12: lenses; OL: objective lens; D1-D3: dichroic mirrors; F1-F3: filters; M:

609 mirrors; DM: deformable mirror; WFS: wavefront sensor; PMT1-2: photomultiplier tubes; ETL:

610 electrically tunable lens.

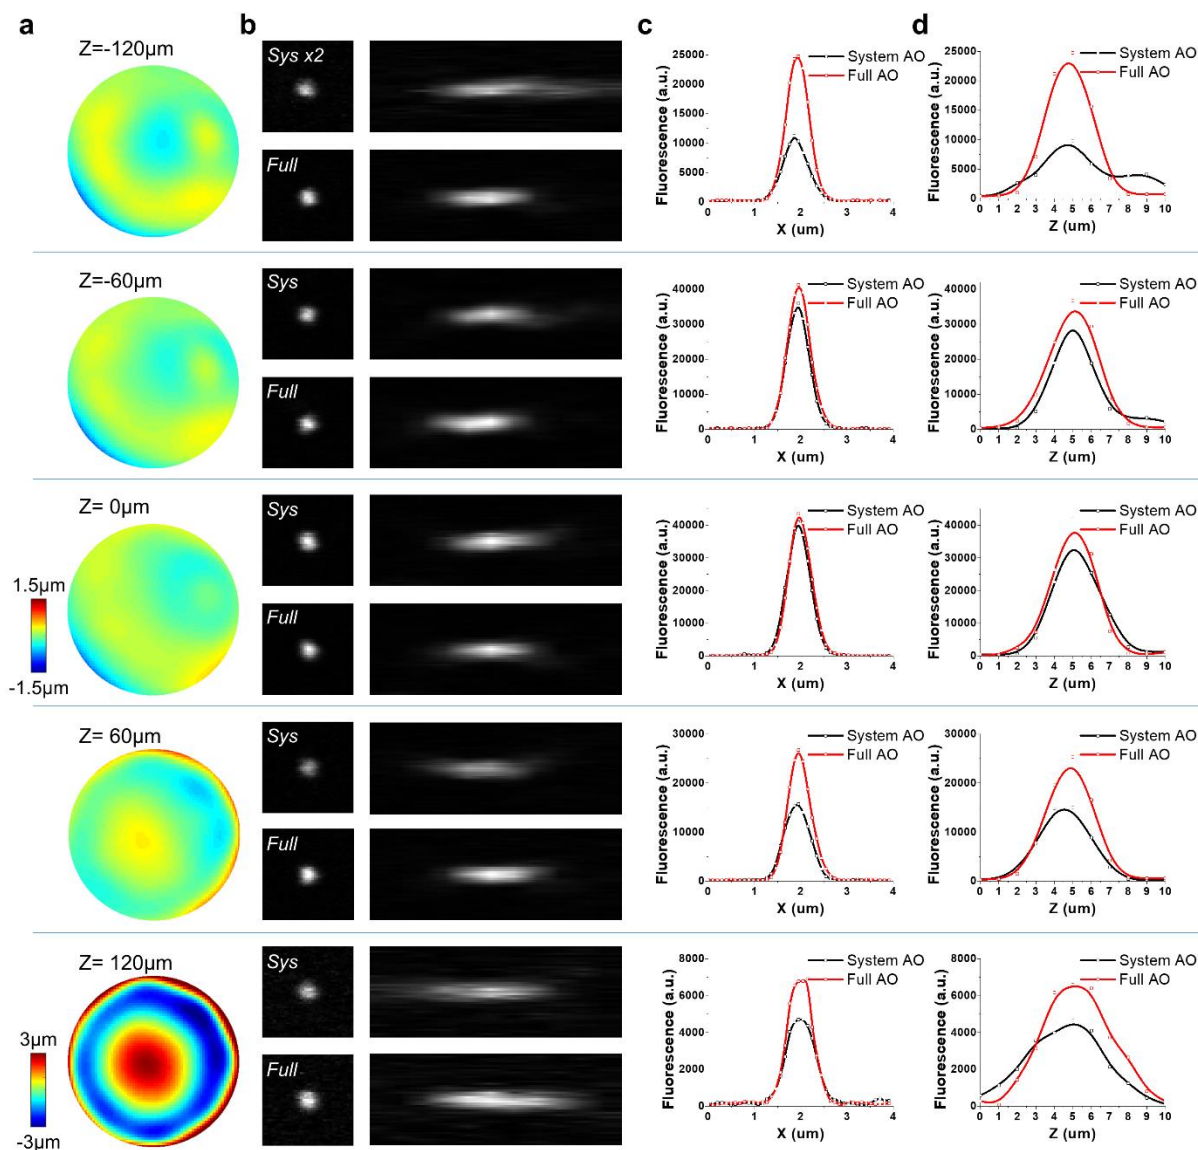

611

612 **Supplementary Figure 2 | Characterization of the on-axis aberrations of the GRIN lens.** Column (a):

613 The wavefront distortion at different depths along the optical axis. Column (b): Lateral and axial PSF

614 measured with fluorescent beads that were 0.2  $\mu\text{m}$  in diameter at the corresponding depths. Column (c):

615 The lateral intensity profile before and after AO correction at the corresponding depths. Column (d): The

616 axial intensity profile before and after AO correction at the corresponding depths.

617

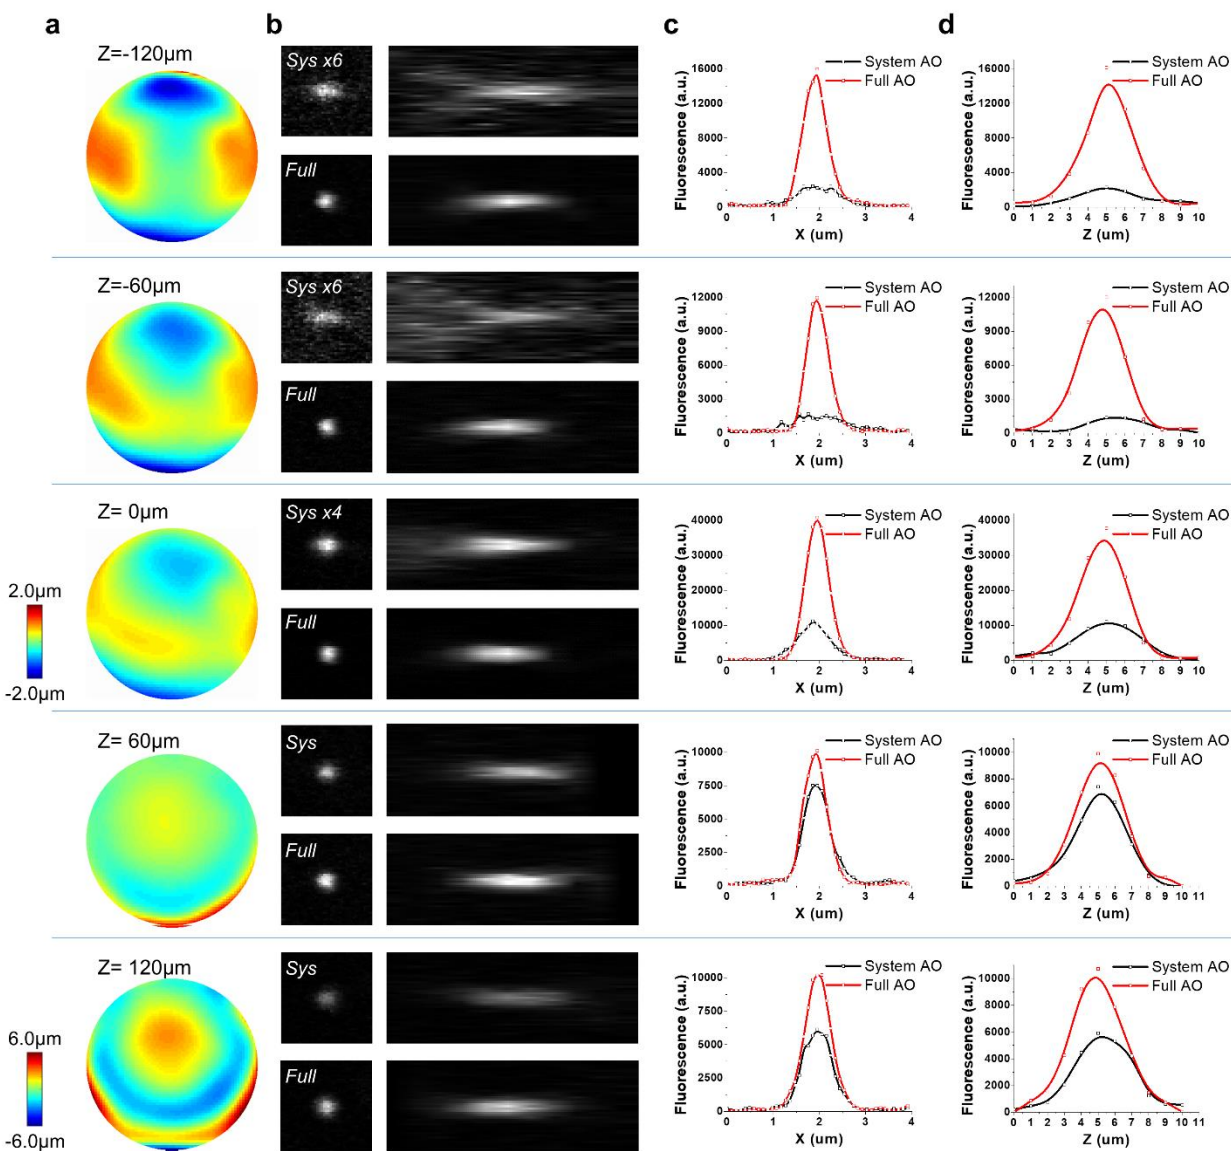

618

619 **Supplementary Figure 3 | Characterization of the off-axis ( $r=60\ \mu\text{m}$ ) aberrations of the GRIN lens.**

620 Column (a): (a) The wavefront distortion at a distance of  $60\ \mu\text{m}$  from the field center at different depths

621 along the optical axis. Column (b): Lateral and axial PSF measured with fluorescent beads that were  $0.2$

622  $\mu\text{m}$  in diameter at the corresponding depths. Column (c): The lateral intensity profile before and after AO

623 correction at the corresponding depths. Column (d): The axial intensity profile before and after AO

624 correction at the corresponding depths.

625

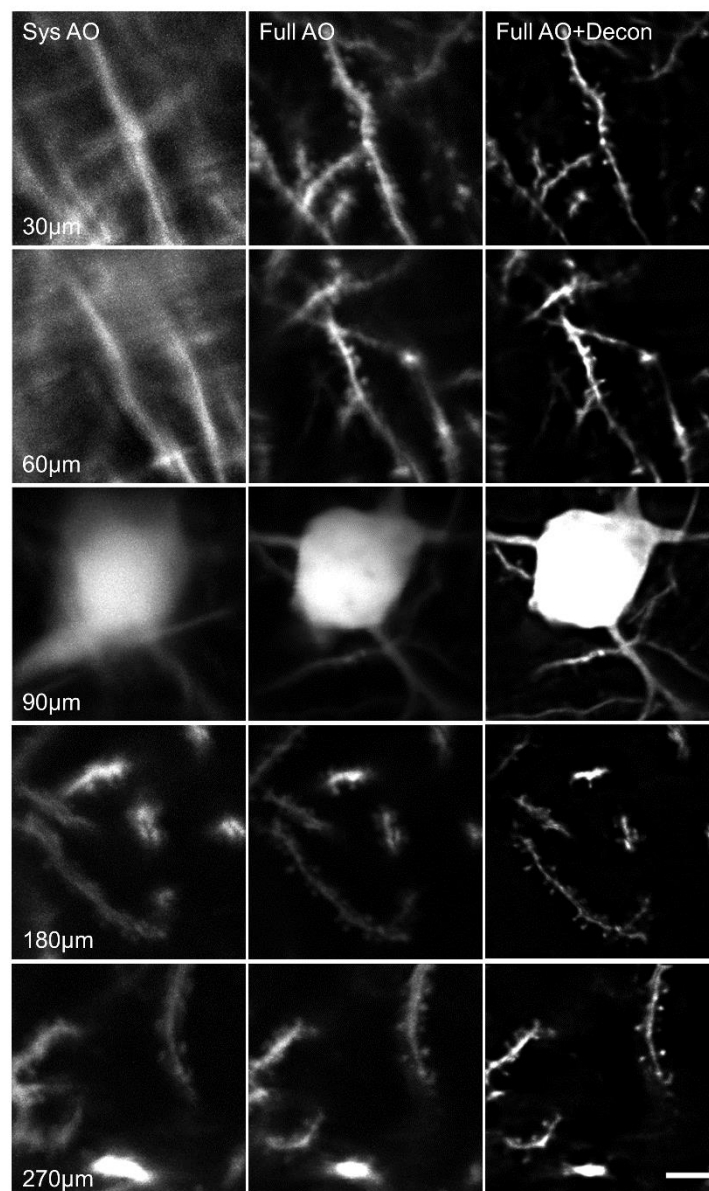

626

627 **Supplementary Figure 4 | Comparison of system AO, full AO and full AO with deconvolution at**  
628 **different imaging depths.** The results demonstrate that AO can significantly improve the imaging  
629 resolution at all imaging depths. Scale bar: 5  $\mu\text{m}$ .

630



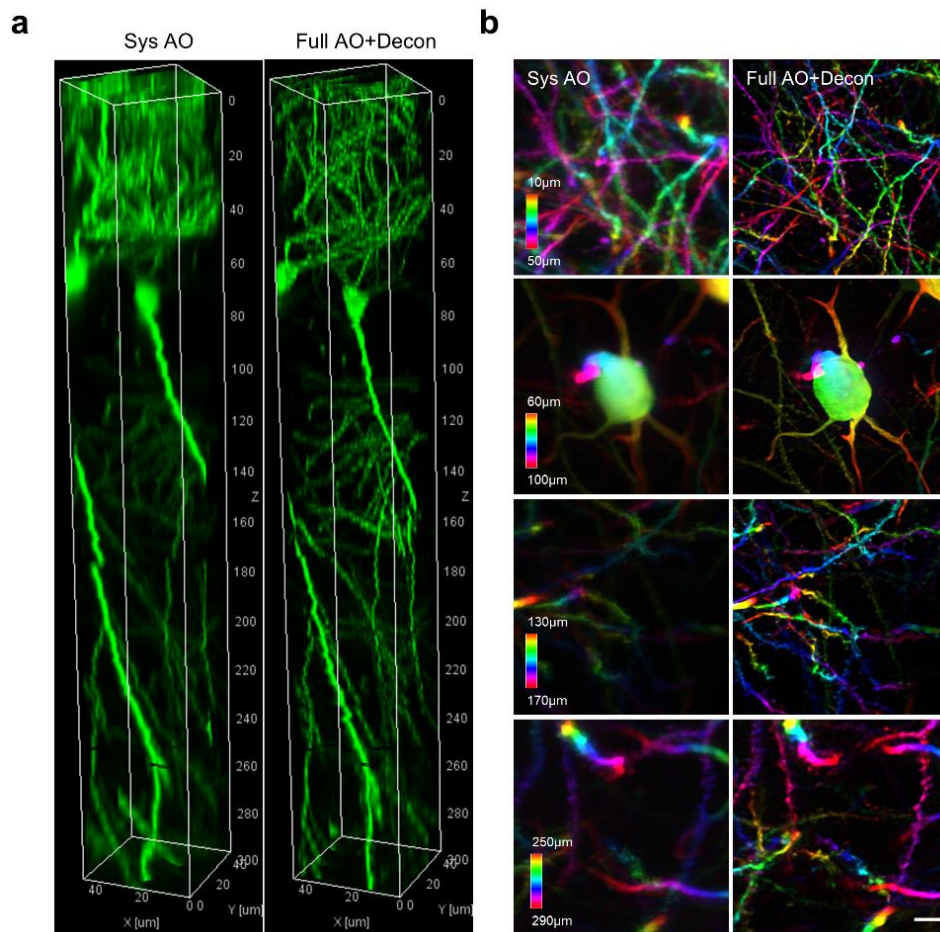

631

632 **Supplementary Figure 5 | Three-dimensional imaging of the column located at the center ( $r=0$ ).** (a)

633 In vivo imaging of GFP-labeled CA1 neurons in a  $50 \times 50 \times 300 \mu\text{m}^3$  volume with system (left) and full (right)

634 AO correction. (b) MIPs of four subvolumes with system (left) and full (right) AO correction where the

635 structures are color-coded by depth. Scale bar:  $5 \mu\text{m}$ .

636

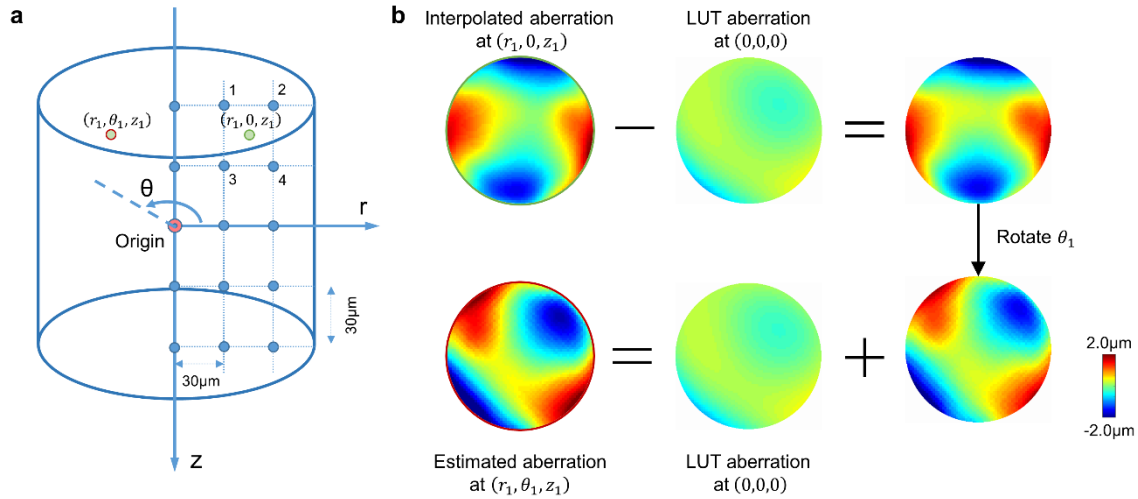

637

638 **Supplementary Figure 6 | Lookup table for the aberrations of the GRIN lens. (a)** Calibration of the

639 lookup table. Considering the cylindrical symmetry of the GRIN lens, the cylindrical coordinate system

640 was used to describe the imaging location. The origin is defined as the center located at the designed

641 working distance of the GRIN lens. The entire imaging FOV had a radius of 150  $\mu\text{m}$  and a depth of 300

642  $\mu\text{m}$ . We measured the intrinsic aberration of the GRIN lens in the  $\theta=0$  subplane at 30  $\mu\text{m}$  intervals, shown

643 as blue dots in the figure. **(b)** Estimation of GRIN lens-induced aberration using the lookup table. To find

644 the aberration at location  $(r_1, \theta_1, z_1)$  (red dot in (a)), we first estimate the aberration at the rotational

645 symmetrical point  $(r_1, 0, z_1)$  using linear interpolation of the aberrations nearby (the blue dots labeled 1-

646 4). Then the aberration at the origin is subtracted from the interpolated wavefront distortion, and the

647 resulting wavefront is rotated by the angle  $\theta_1$  and added back to the aberration at the origin.

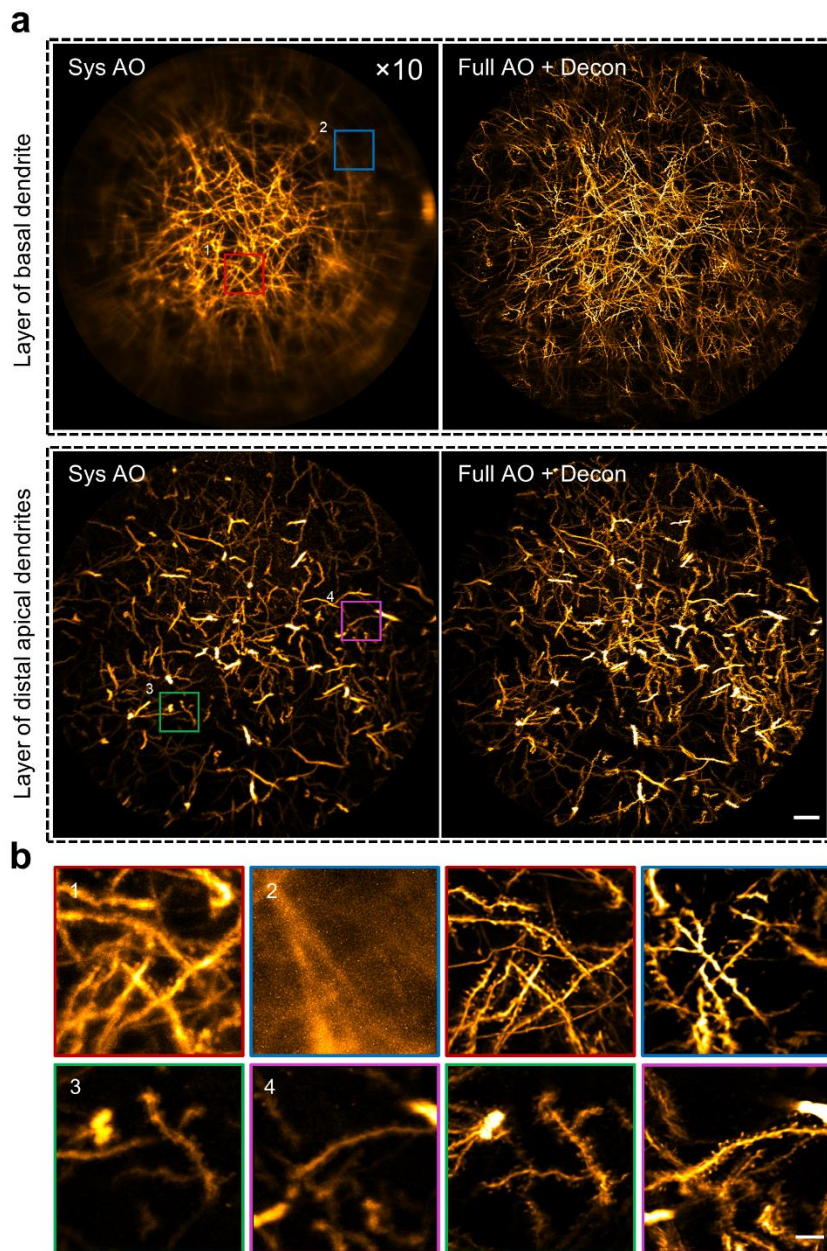

648

649 **Supplementary Figure 7 | AO improves resolution over a large FOV. (a)** MIPs of the basal dendrite  
650 layer and the distal apical dendrite layer with system (left) and full (right) AO correction. The entire FOV  
651 is 300  $\mu\text{m}$  in diameter. Scale bar: 20  $\mu\text{m}$ . **(b)** Left: four magnified views of the sub-regions indicated by the  
652 numbered boxes in (a). Depth range of projection for the layer of basal dendrites: 20-50  $\mu\text{m}$ ; and for layer  
653 of distal apical dendrites: 190-220  $\mu\text{m}$ . Scale bar: 5  $\mu\text{m}$ .

654

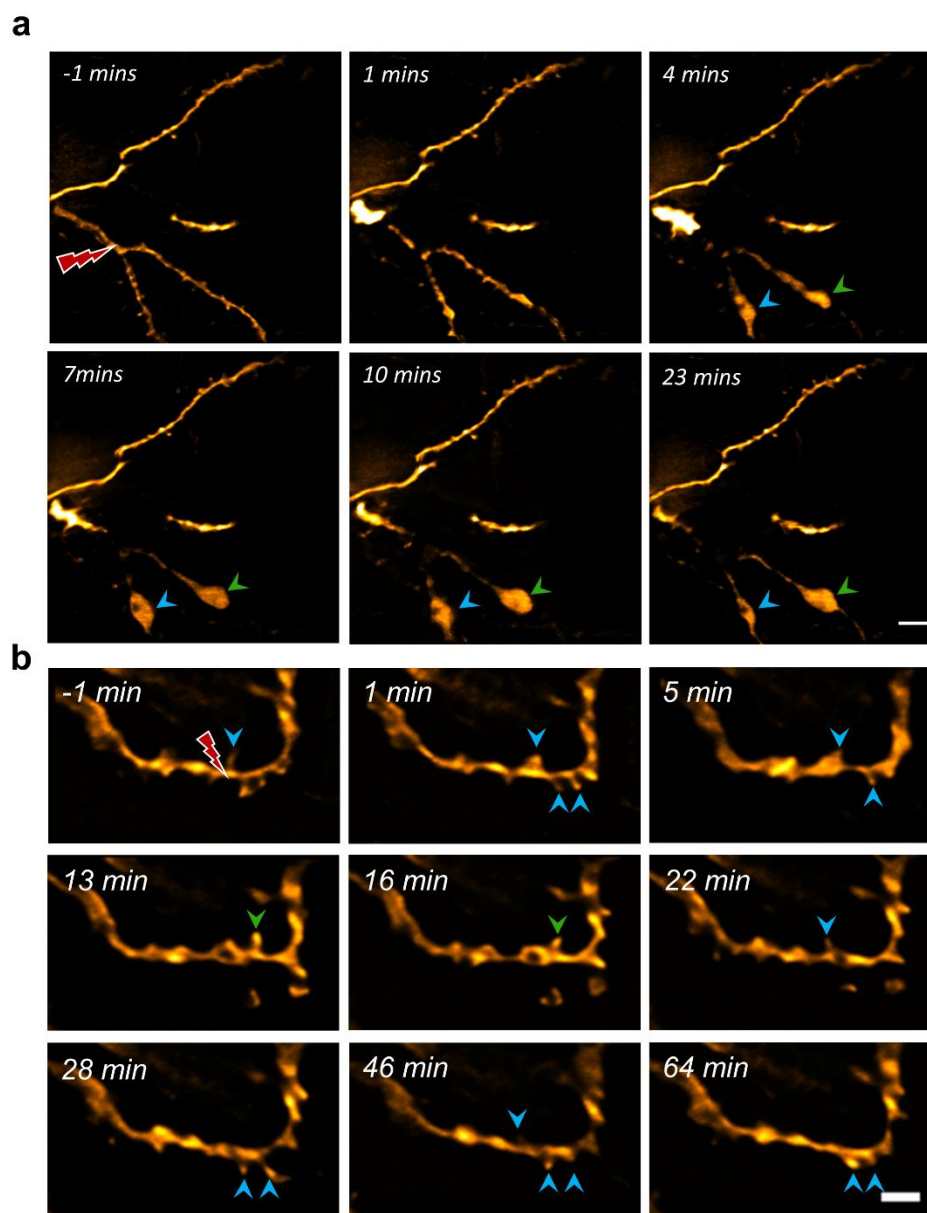

655

656 **Supplementary Figure 8 | Time-lapse imaging of dendritic dynamics after laser injury.** (a) Laser  
657 cutting of dendritic branches leads to rapid and prolonged degeneration that resembles Wallerian axonal  
658 degeneration. The bead-like formation at the distal end of the dendrites were indicated by the colored  
659 arrowheads. Scale bar: 5  $\mu\text{m}$  (b) Laser-mediated micro-lesion of dendritic shaft causes recurrent  
660 spinogenesis near the site of injury. The blue and green arrowhead indicate recurrent spine and newly-  
661 appeared spine, respectively. Scale bar: 2  $\mu\text{m}$ .

662

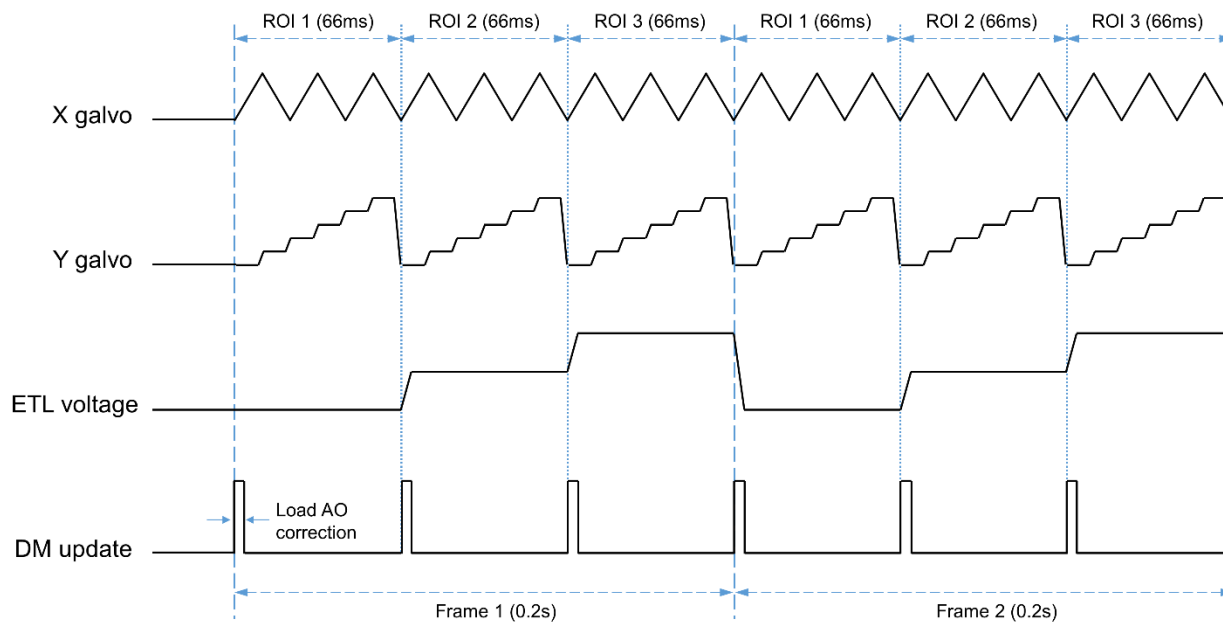

663

664 **Supplementary Figure 9 | Control signals of x, y scanners, the ETL and the DM for random-access**

665 **multiplane imaging.**

666

667

668

669

670

671

672

673

674

675

676

677

678

679

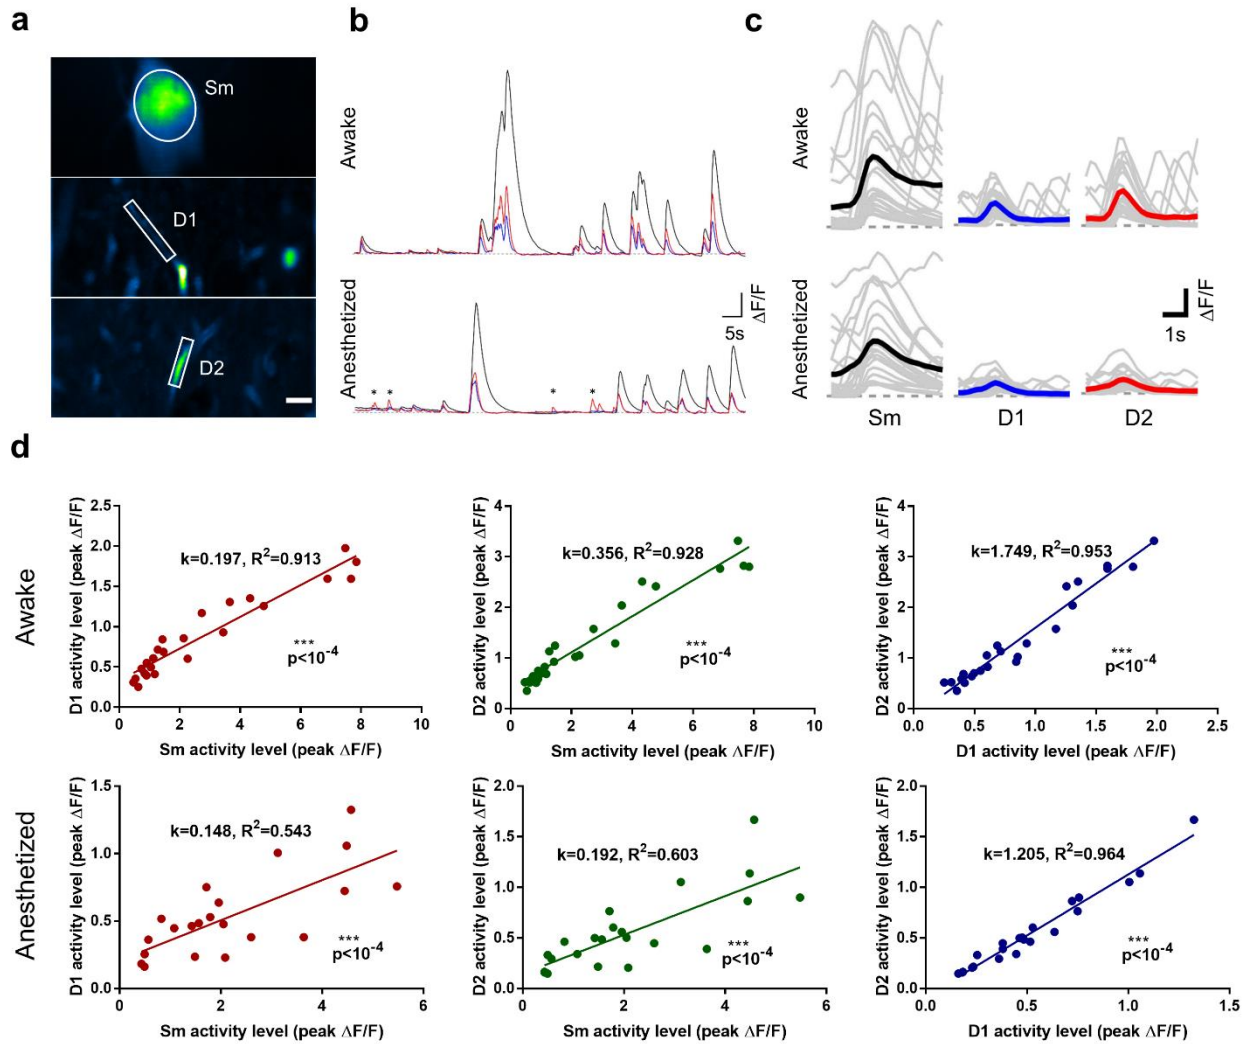

680

681 **Supplementary Figure 10 | Correlated somato-dendritic spontaneous activity of hippocampal CA**

682 **pyramidal neuron is brain-state dependent.** (a) *In vivo* multiplane calcium imaging of somato (Sm) and

683 dendritic (D1, D2) activity of single neuron in mice hippocampus. Images are shown as STD projection of the

684 600 frames. Scale bar: 5 $\mu$ m. (b) Calcium transients ( $\Delta F/F$ ) of soma and dendrites shown in (a) under mice

685 wakefulness (upper) and isoflurane-induced anesthesia (lower). Black: Sm, Blue: D1, Red: D2. The asterisks

686 indicate the unpaired dendritic transients appeared in isoflurane anesthesia. (c) Firing events of soma (Sm) and

687 dendrites (D1, D2) at different brain states. Grey and colored curves represent the individual and average event,

688 respectively. (d) Relationship between activity strength of soma and dendrites under mice wakefulness and

689 anesthesia.

690

691 **Supplementary Table 1 | Wavefront sensing and in vitro imaging parameters.**

692

|                                                                      | <b>Fig. S1b</b>                       | <b>Fig. S2b</b>                       |
|----------------------------------------------------------------------|---------------------------------------|---------------------------------------|
| Fluorescence labels                                                  | Green fluorescence beads/Rhodamine 6G | Green fluorescence beads/Rhodamine 6G |
| Excitation power (mW)                                                | 30                                    | 50                                    |
| (r, $\theta$ , z) coordinates ( $\mu\text{m}$ , deg, $\mu\text{m}$ ) | (0,0,-150~150)                        | (60,180,-150~150)                     |
| Subunit volume ( $\mu\text{m}^3$ )                                   | 50×50×40                              | 50×50×40                              |
| Voxel volume ( $\mu\text{m}^3$ )                                     | 0.097×0.097×1                         | 0.097×0.097×1                         |
| Pixel rate (pixels/s)                                                | 256K                                  | 256K                                  |
| Corrective field ( $\mu\text{m}^2$ )                                 | 30×30                                 | 30×30                                 |
| Guide star integration time (s)                                      | 1                                     | 1                                     |

693

694

695 **Supplementary Table 2 | Wavefront sensing and *in vivo* morphological imaging parameters.**

696

|                                                                      | <b>Fig. 1a</b>       | <b>Fig. S4a</b>    | <b>Fig. S5a</b> | <b>Fig. S8a</b> |
|----------------------------------------------------------------------|----------------------|--------------------|-----------------|-----------------|
| Fluorescence labels                                                  | GFP                  | GFP                | GFP             | GFP             |
| Excitation power (mW)                                                | 30                   | 50                 | 30              | 30              |
| (r, $\theta$ , z) coordinates ( $\mu\text{m}$ , deg, $\mu\text{m}$ ) | (60, -162, -150~150) | (96,106, -150~150) | (0,0,-150~150)  | (0,0,-95--55)   |
| Subunit volume ( $\mu\text{m}^3$ )                                   | 50×50×40             | 50×50×40           | 50×50×40        | 50×50×40        |
| Voxel volume ( $\mu\text{m}^3$ )                                     | 0.097×0.097×1        | 0.097×0.097×1      | 0.097×0.097×1   | 0.097×0.097×1   |
| Pixel rate (pixels/s)                                                | 256K                 | 256K               | 256K            | 256K            |
| Corrective field ( $\mu\text{m}^2$ )                                 | 30×30                | 30×30              | 30×30           | 30×30           |
| Guide star integration time (s)                                      | 1~2                  | 1~3                | 1~2             | 1               |

697

698

699

700

701

702

703

704

705

706

707

708

709

710 **Supplementary Table 2 (continued) | Wavefront sensing and *in vivo* morphological imaging**  
 711 **parameters.**  
 712

|                                                                      | <b>Fig. 2a (upper)</b> | <b>Fig. 2a (lower)</b> | <b>Fig. S7a (upper)</b> | <b>Fig. S7a (lower)</b> |
|----------------------------------------------------------------------|------------------------|------------------------|-------------------------|-------------------------|
| Fluorescence labels                                                  | GFP                    | GFP                    | GFP                     | GFP                     |
| Excitation power (mW)                                                | 30                     | 30                     | 30                      | 50                      |
| (r, $\theta$ , z) coordinates ( $\mu\text{m}$ , deg, $\mu\text{m}$ ) | (0~150,0~360,-90~50)   | (0~150,0~360,-20~20)   | (0~150,0~360,-140~100)  | (0~150,0~360,30~70)     |
| Subunit volume ( $\mu\text{m}^3$ )                                   | 50×50×40               | 50×50×40               | 50×50×40                | 50×50×40                |
| Voxel volume ( $\mu\text{m}^3$ )                                     | 0.097×0.097×1          | 0.097×0.097×1          | 0.097×0.097×1           | 0.097×0.097×1           |
| Pixel rate (pixels/s)                                                | 984K                   | 128K                   | 128K                    | 256K                    |
| Corrective field ( $\mu\text{m}^2$ )                                 | 30×30                  | 30×30                  | 30×30                   | 30×30                   |
| Guide star integration time (s)                                      | 1                      | 1                      | 1                       | 1                       |

713  
 714  
 715  
 716  
 717  
 718  
 719  
 720

**Supplementary Table 3 | Wavefront sensing and *in vivo* calcium imaging parameters.**

|                                                                      | <b>Fig. 4b</b>                                              | <b>Fig. 5b</b>                                                 | <b>Fig. S4d</b>                                                   | <b>Fig. S10a</b>                                               |
|----------------------------------------------------------------------|-------------------------------------------------------------|----------------------------------------------------------------|-------------------------------------------------------------------|----------------------------------------------------------------|
| Fluorescence labels                                                  | GCaMP6s                                                     | GCaMP6s                                                        | GCaMP6s                                                           | GCaMP6s                                                        |
| Excitation power (mW)                                                | 30                                                          | 30                                                             | 30                                                                | 30                                                             |
| (r, $\theta$ , z) coordinates ( $\mu\text{m}$ , deg, $\mu\text{m}$ ) | P1: (84, -71, -99)<br>P2: (80, -55, -42)<br>P3: (79,78,-78) | P1: (156, -88, -108)<br>P2: (79, 78, -83)<br>P3: (61, 81, -57) | P1: (64, -1.7, -119)<br>P2: (93, -83, -119)<br>P3: (86, 82, -109) | P1: (156, -88, -108)<br>P2: (80, 78, -80)<br>P3: (64, 81, -53) |
| FOV of each plane ( $\mu\text{m}^2$ )                                | 50×26                                                       | 50×26                                                          | 50×26                                                             | 50×26                                                          |
| Pixel size( $\mu\text{m}^2$ )                                        | 0.195×0.195                                                 | 0.195×0.195                                                    | 0.195×0.195                                                       | 0.195×0.195                                                    |
| Pixel rate (pixels/s)                                                | 507K                                                        | 507K                                                           | 507K                                                              | 507K                                                           |
| Corrective Field( $\mu\text{m}^2$ )                                  | 30×30                                                       | 30×30                                                          | 30×30                                                             | 30×30                                                          |
| Guide star integration time (s)                                      | 1                                                           | 1                                                              | 1                                                                 | 1                                                              |

721  
 722  
 723  
 724  
 725



726 **Supplementary Video 1 | AO enables multiplane Ca<sup>2+</sup> imaging of pyramidal neuron at synaptic resolution**  
727 **in awake behaving mice.** Three planes (P1-3) were sequentially captured at 5Hz for calcium imaging of  
728 neuronal somata, dendrites and spines, respectively, in the hippocampus CA1 during mice wakefulness.

729  
730  
731 **Supplementary Video 2 | AO enables accurate recording of calcium transients by eliminating the cross**  
732 **talk of neighboring neurons.** Three ROIs in the stratum pyramidale of hippocampus CA1 were sequentially  
733 captured at 5Hz. With AO full correction, the neighboring neurons can be distinguished from each other without  
734 cross talk of the fluorescence signal.

735  
736 **Supplementary Video 3 | Simultaneous Ca<sup>2+</sup> imaging of somato and dendritic activity of single**  
737 **pyramidal neuron in awake mice.** The Soma and two pyramidal dendrites of a pyramidal neuron in  
738 hippocampus CA1 were selected for near simultaneous Ca<sup>2+</sup> imaging. It shows that somato and dendritic activity  
739 are highly correlated.

740

741

742
